# Supplementary material
Source: PubMed Central journal article supplement (PMC3058848)
Supplement: NIHMS244520-supplement-supplemental_data-NMR.pdf [file NIHMS244520-supplement-supplemental_data-NMR.pdf]

## Clerodane diterpenes from *Casearia arguta* that act as synergistic TRAIL sensitizers

Emily L. Whitson, Cheryl L. Thomas, Curtis J. Henrich, Thomas J. Sayers, James B. McMahon, and Tawnya C. McKee

### Supporting Info

|            |                                                                                                                                     |         |
|------------|-------------------------------------------------------------------------------------------------------------------------------------|---------|
| <b>S2</b>  | <sup>1</sup> H NMR Spectrum of Argutin A ( <b>1</b> ) in CDCl <sub>3</sub>                                                          | Page 2  |
| <b>S3</b>  | <sup>13</sup> C NMR Spectrum of Argutin A ( <b>1</b> ) in CDCl <sub>3</sub>                                                         | Page 3  |
| <b>S4</b>  | <sup>1</sup> H NMR Spectrum of Argutin B ( <b>2</b> ) in CDCl <sub>3</sub>                                                          | Page 4  |
| <b>S5</b>  | <sup>13</sup> C NMR Spectrum of Argutin B ( <b>2</b> ) in CDCl <sub>3</sub>                                                         | Page 5  |
| <b>S6</b>  | <sup>1</sup> H NMR Spectrum of Argutin C ( <b>3</b> ) in CDCl <sub>3</sub>                                                          | Page 6  |
| <b>S7</b>  | <sup>13</sup> C NMR Spectrum of Argutin C ( <b>3</b> ) in CDCl <sub>3</sub>                                                         | Page 7  |
| <b>S8</b>  | <sup>1</sup> H NMR Spectrum of Argutin D ( <b>4</b> ) in CDCl <sub>3</sub>                                                          | Page 8  |
| <b>S9</b>  | <sup>13</sup> C NMR Spectrum of Argutin D ( <b>4</b> ) in CDCl <sub>3</sub>                                                         | Page 9  |
| <b>S10</b> | <sup>1</sup> H NMR Spectrum of Argutin E ( <b>5</b> ) in CDCl <sub>3</sub>                                                          | Page 10 |
| <b>S11</b> | <sup>13</sup> C NMR Spectrum of Argutin E ( <b>5</b> ) in CDCl <sub>3</sub>                                                         | Page 11 |
| <b>S12</b> | <sup>1</sup> H NMR Spectrum of Argutin F ( <b>6</b> ) in CDCl <sub>3</sub>                                                          | Page 12 |
| <b>S13</b> | HSQC Spectrum of Argutin F ( <b>6</b> ) in CDCl <sub>3</sub>                                                                        | Page 13 |
| <b>S14</b> | <sup>1</sup> H NMR Spectrum of Argutin G ( <b>7</b> ) in CDCl <sub>3</sub>                                                          | Page 14 |
| <b>S15</b> | HSQC Spectrum of Argutin G ( <b>7</b> ) in CDCl <sub>3</sub>                                                                        | Page 15 |
| <b>S16</b> | <sup>1</sup> H NMR Spectrum of Argutin H ( <b>8</b> ) in CDCl <sub>3</sub>                                                          | Page 16 |
| <b>S17</b> | HSQC Spectrum of Argutin H ( <b>8</b> ) in CDCl <sub>3</sub>                                                                        | Page 17 |
| <b>S18</b> | <sup>1</sup> H NMR Spectrum of Argutin A ( <i>S</i> )-MTPA Ester ( <b>1S</b> ) in CDCl <sub>3</sub>                                 | Page 18 |
| <b>S19</b> | <sup>13</sup> C NMR Spectrum of Argutin A ( <i>S</i> )-MTPA Ester ( <b>1S</b> ) in CDCl <sub>3</sub>                                | Page 19 |
| <b>S20</b> | <sup>1</sup> H NMR Spectrum of Argutin A ( <i>R</i> )-MTPA Ester ( <b>1R</b> ) in CDCl <sub>3</sub>                                 | Page 20 |
| <b>S21</b> | <sup>13</sup> C NMR Spectrum of Argutin A ( <i>R</i> )-MTPA Ester ( <b>1R</b> ) in CDCl <sub>3</sub>                                | Page 21 |
| <b>S22</b> | <sup>1</sup> H NMR Spectrum of Deoxoargutin F ( <b>9</b> ) in CDCl <sub>3</sub>                                                     | Page 22 |
| <b>S23</b> | <sup>13</sup> C NMR Spectrum of Deoxoargutin F ( <b>9</b> ) in CDCl <sub>3</sub>                                                    | Page 23 |
| <b>S24</b> | <sup>1</sup> H NMR Spectrum of Deoxoargutin F ( <i>S</i> )-MTPA Ester ( <b>9S</b> ) in CDCl <sub>3</sub>                            | Page 24 |
| <b>S25</b> | HSQC Spectrum of Deoxoargutin F ( <i>S</i> )-MTPA Ester ( <b>9S</b> ) in CDCl <sub>3</sub>                                          | Page 25 |
| <b>S26</b> | <sup>1</sup> H NMR Spectrum of Deoxoargutin F ( <i>R</i> )-MTPA Ester ( <b>9R</b> ) in CDCl <sub>3</sub>                            | Page 26 |
| <b>S27</b> | HSQC Spectrum of Deoxoargutin F ( <i>R</i> )-MTPA Ester ( <b>9R</b> ) in CDCl <sub>3</sub>                                          | Page 27 |
| <b>T1</b>  | <sup>1</sup> H and <sup>13</sup> C NMR Data for Argutin A ( <i>R</i> )- and ( <i>S</i> )-MTPA Esters ( <b>1S</b> , <b>1R</b> )      | Page 28 |
| <b>T2</b>  | <sup>1</sup> H and <sup>13</sup> C NMR Data for Deoxoargutin F ( <b>9</b> ) in CDCl <sub>3</sub>                                    | Page 29 |
| <b>T3</b>  | <sup>1</sup> H and <sup>13</sup> C NMR Data for Deoxoargutin F ( <i>R</i> )- and ( <i>S</i> )-MTPA Esters ( <b>9S</b> , <b>9R</b> ) | Page 30 |

# $^1\text{H}$ NMR Spectrum of Argutin A (**1**) in $\text{CDCl}_3$

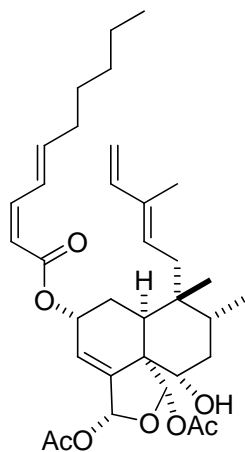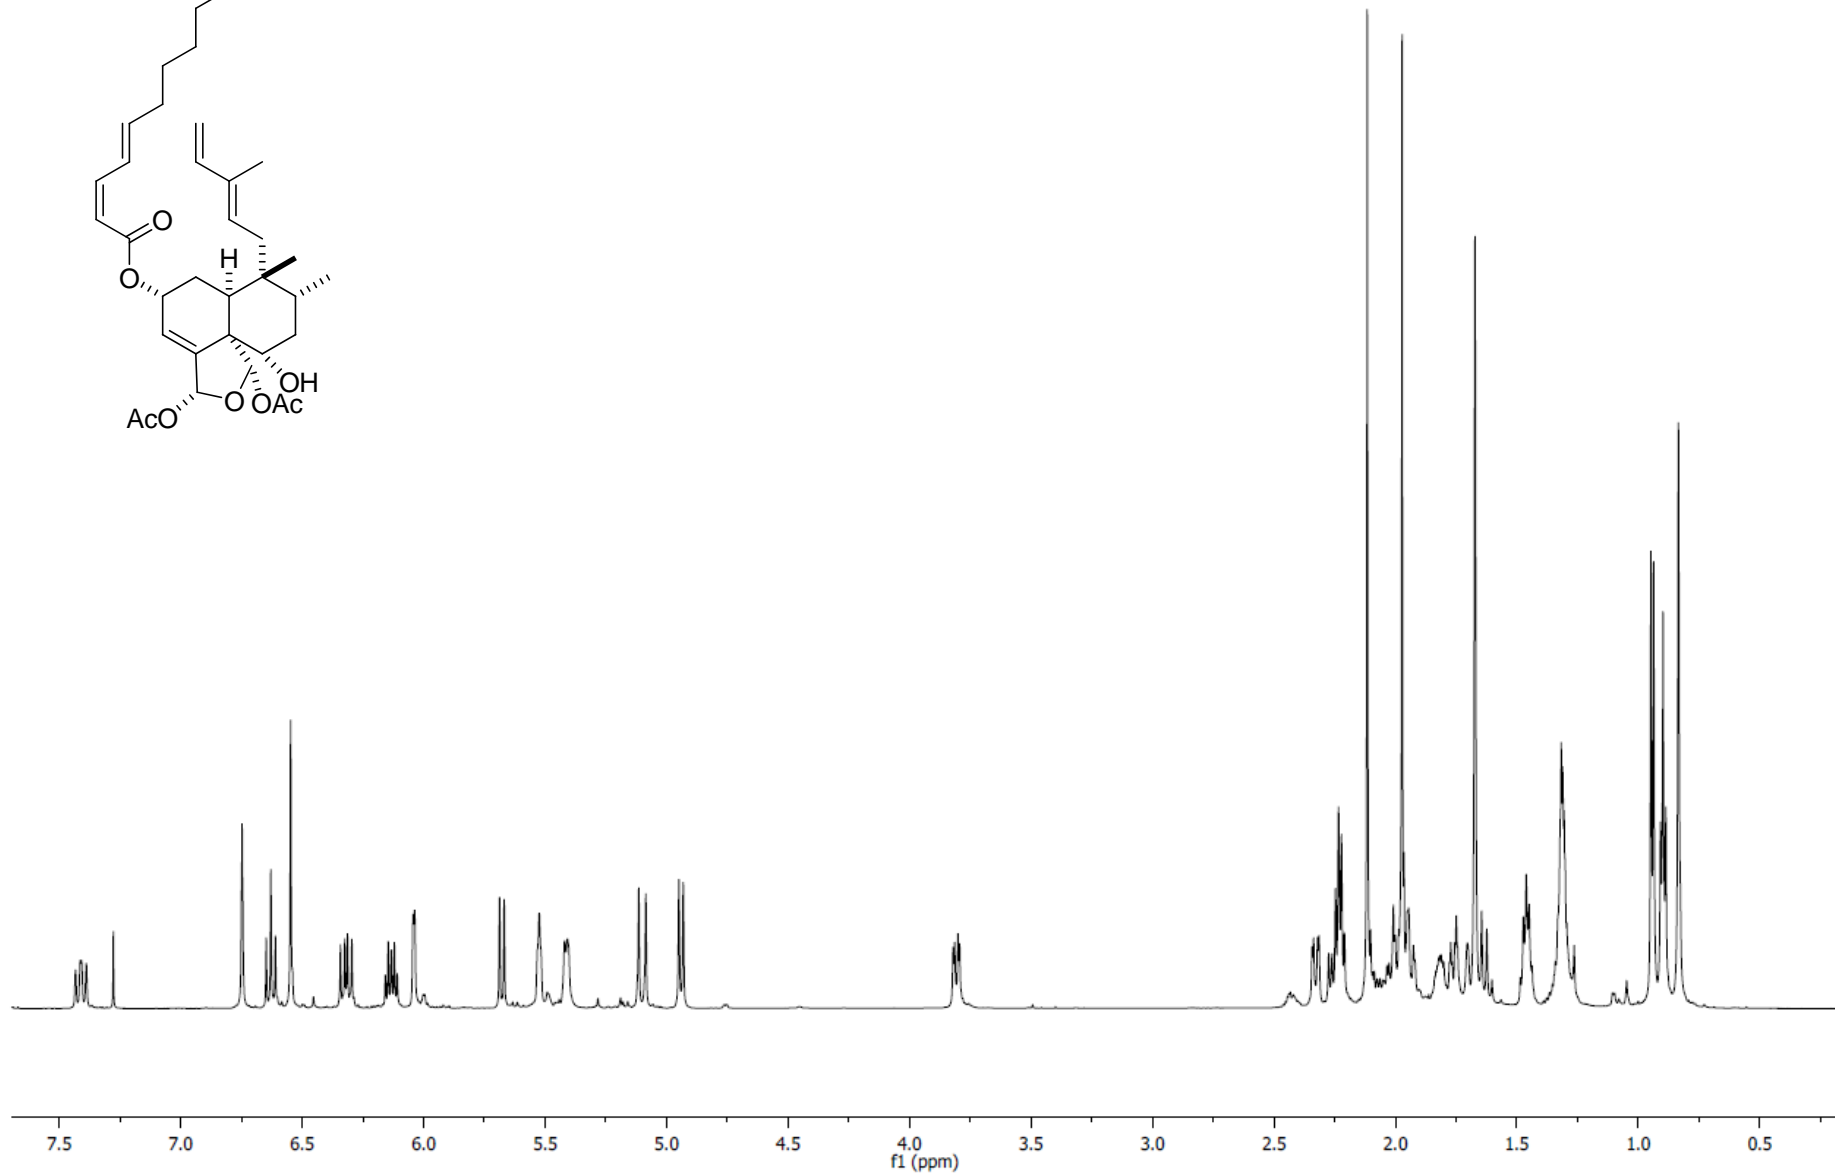

# $^{13}\text{C}$ NMR Spectrum of Argutin A (1) in $\text{CDCl}_3$

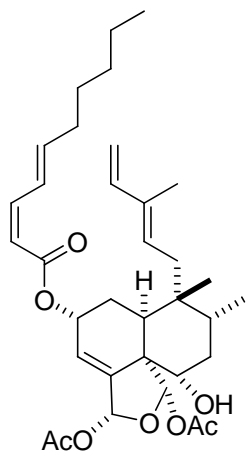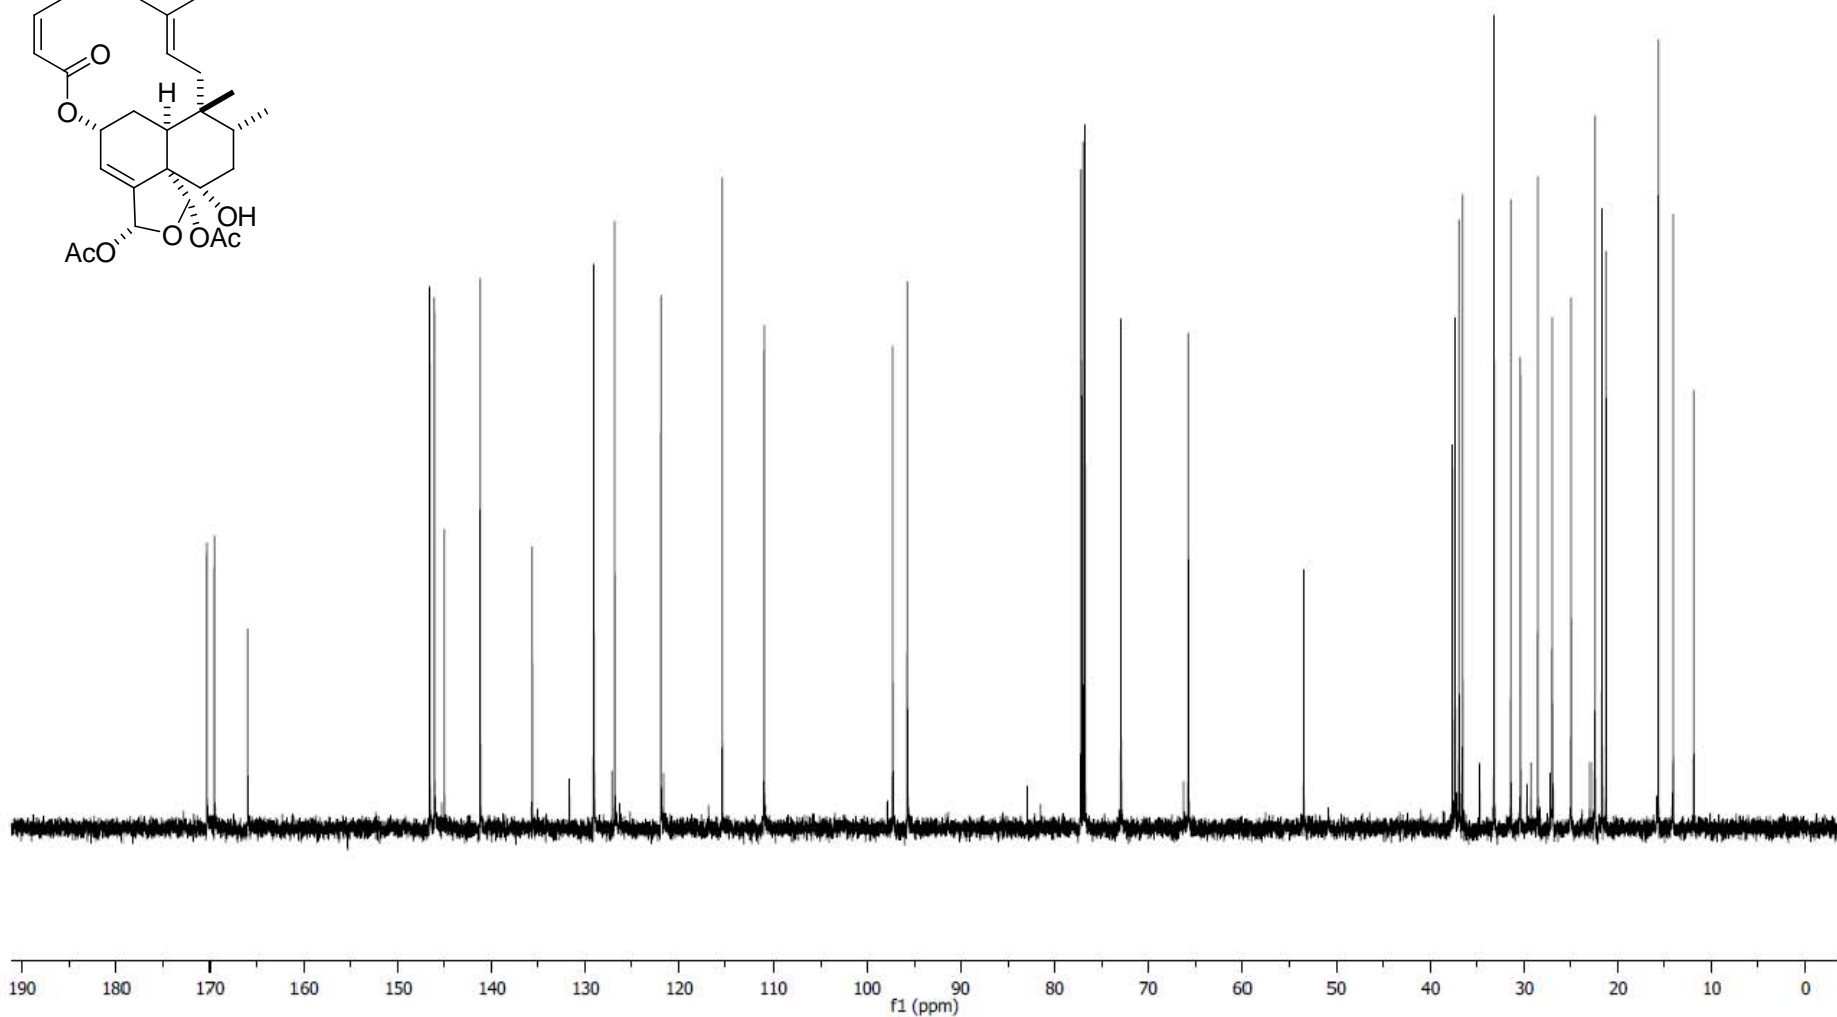

# $^1\text{H}$ NMR Spectrum of Argutin B (2) in $\text{CDCl}_3$

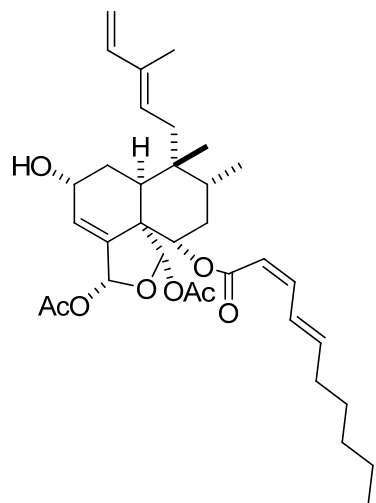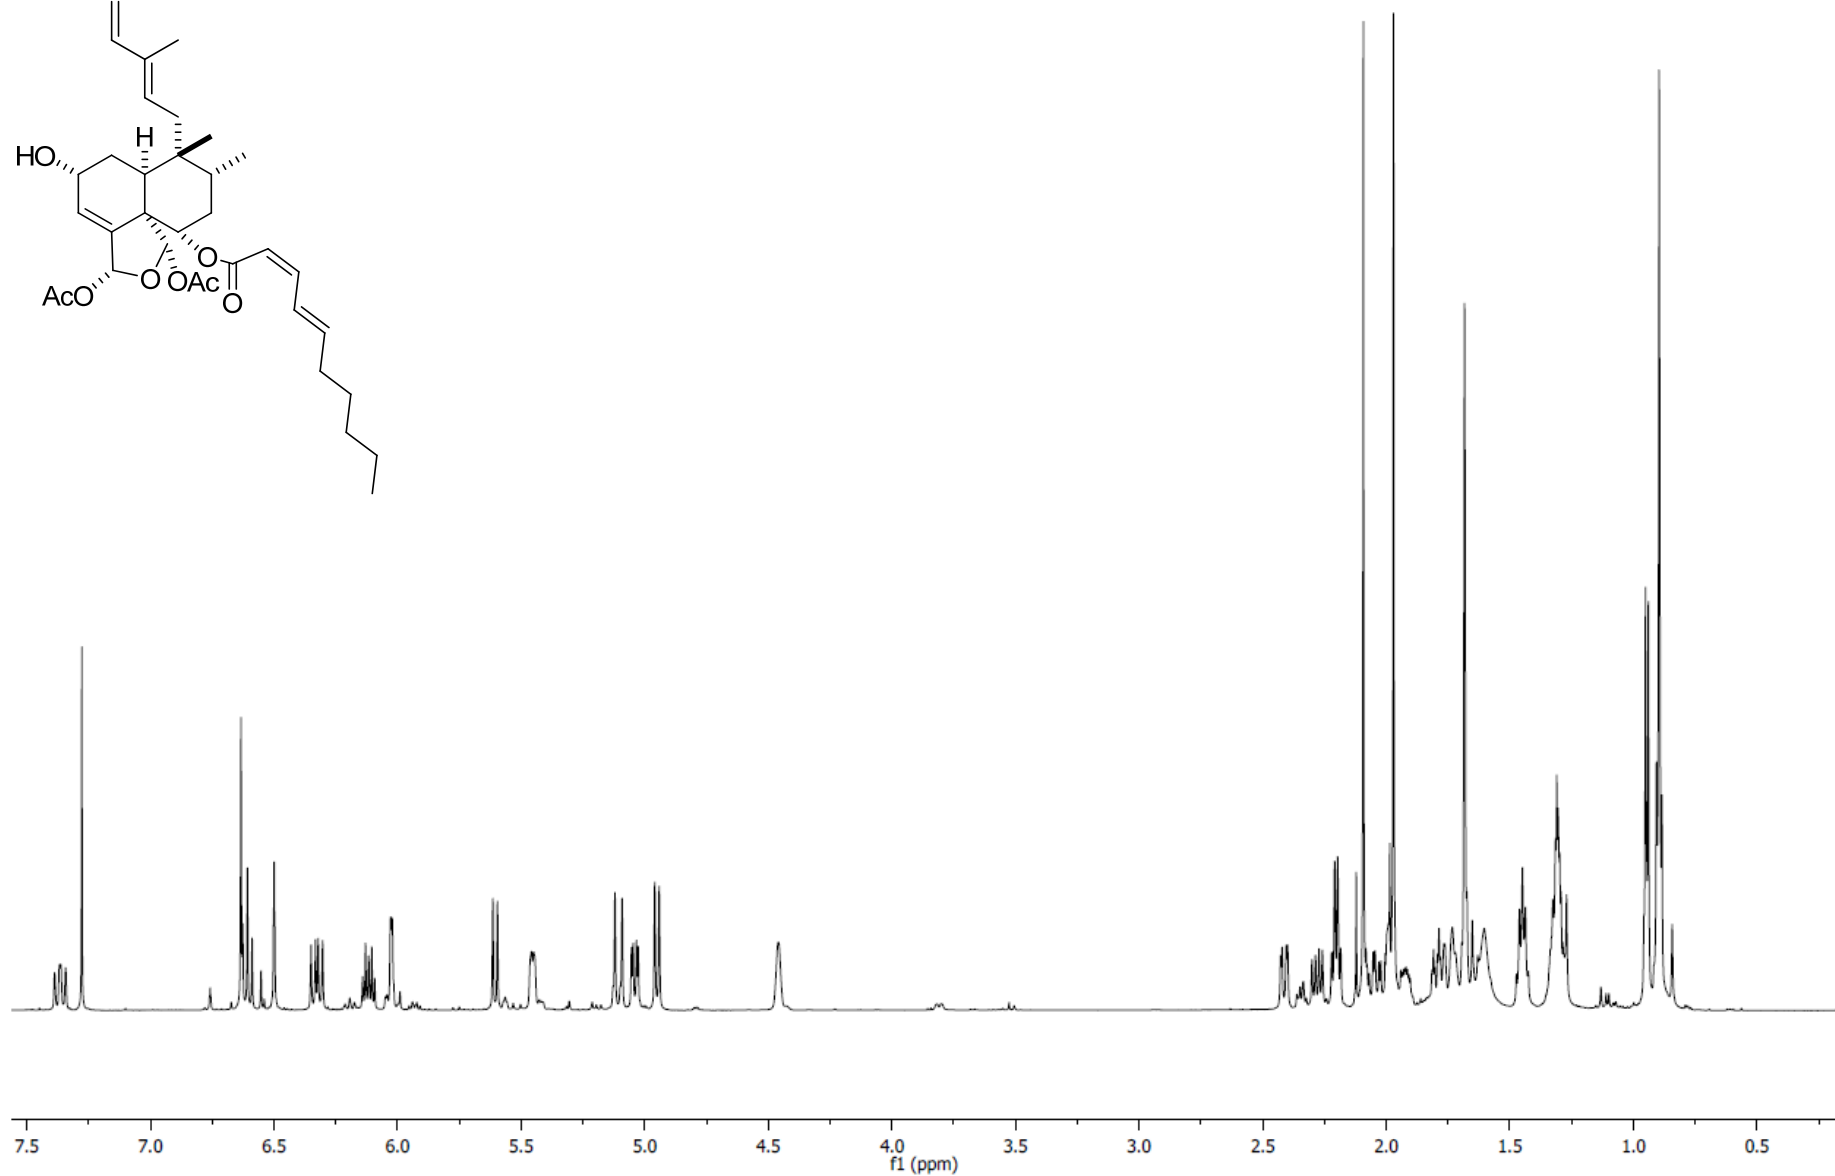

# $^{13}\text{C}$ NMR Spectrum of Argutin B (2) in $\text{CDCl}_3$

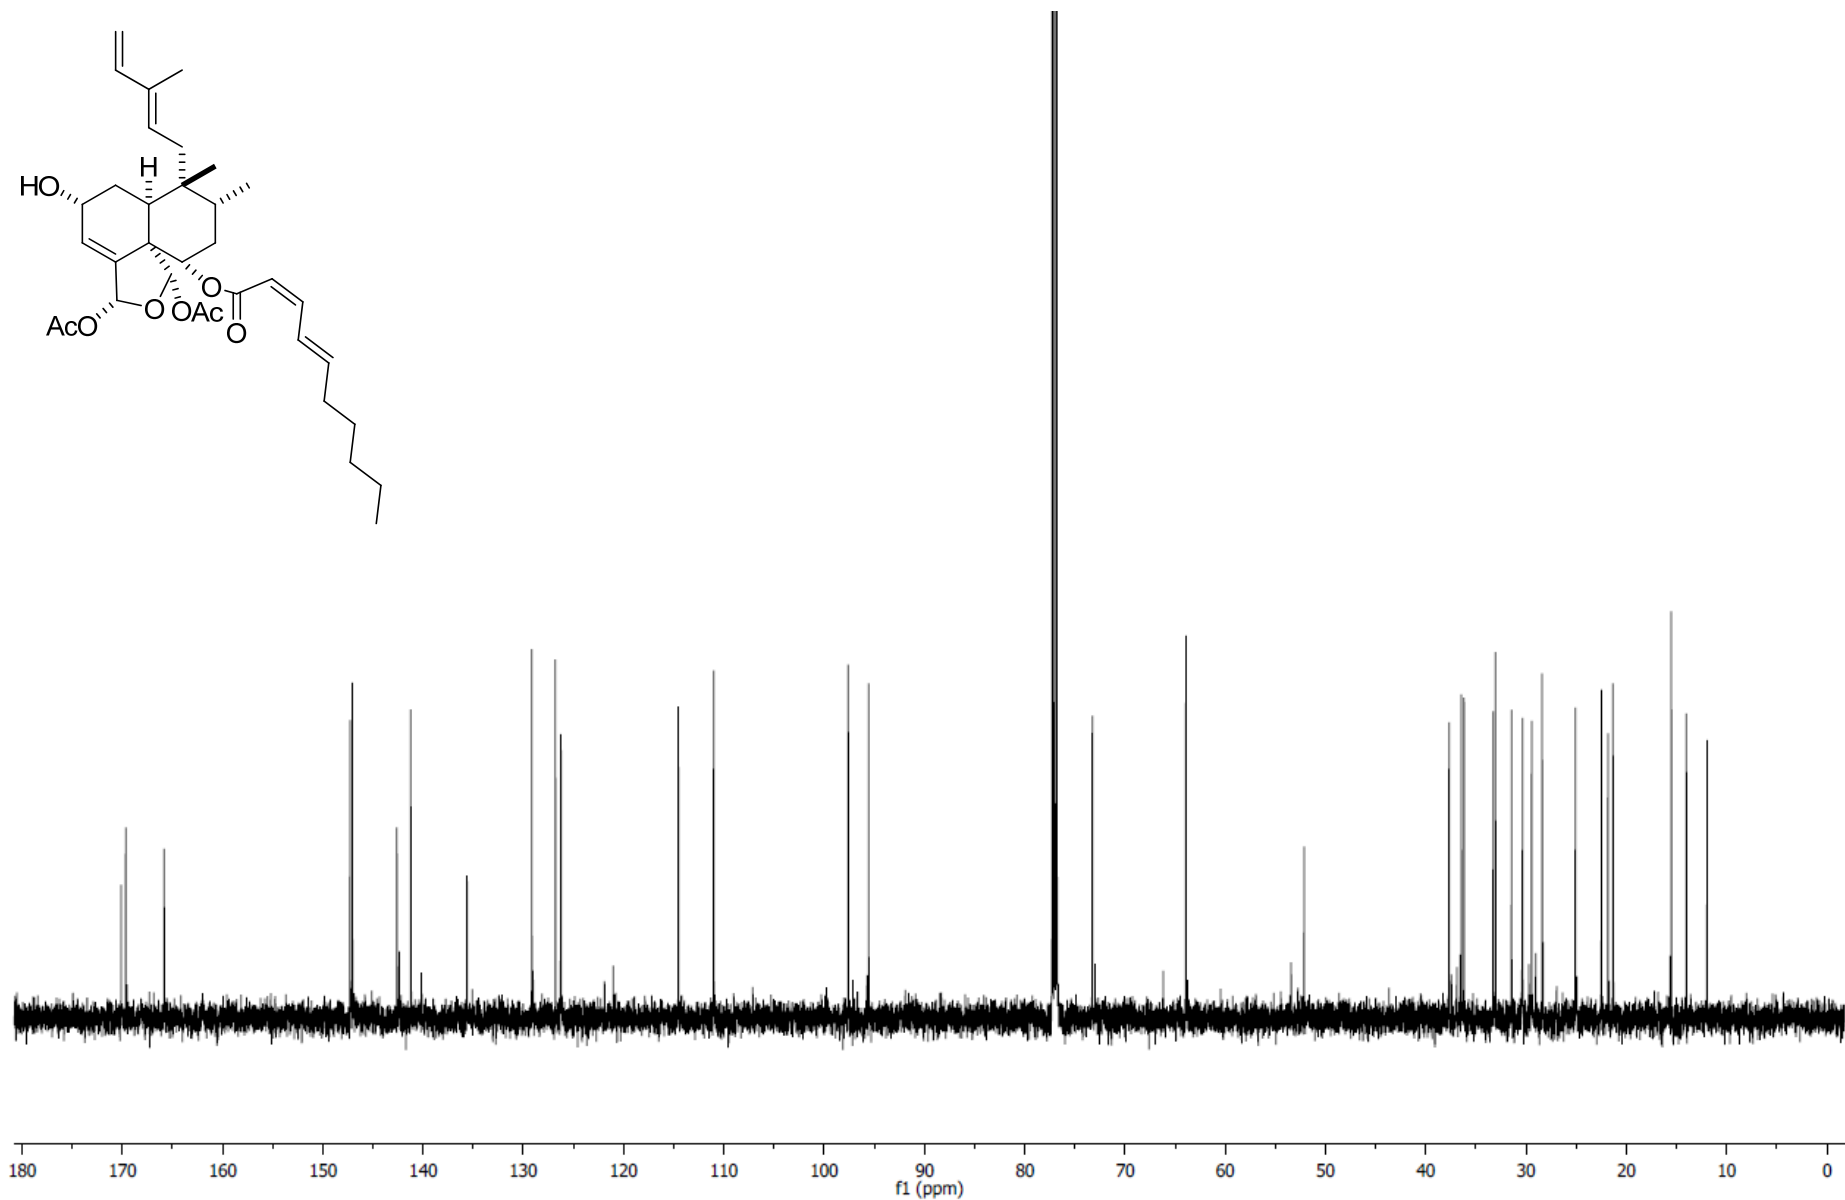

# $^1\text{H}$ NMR Spectrum of Argutin C (**3**) in $\text{CDCl}_3$

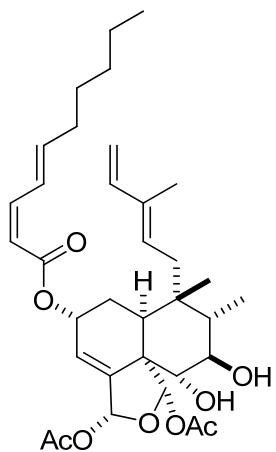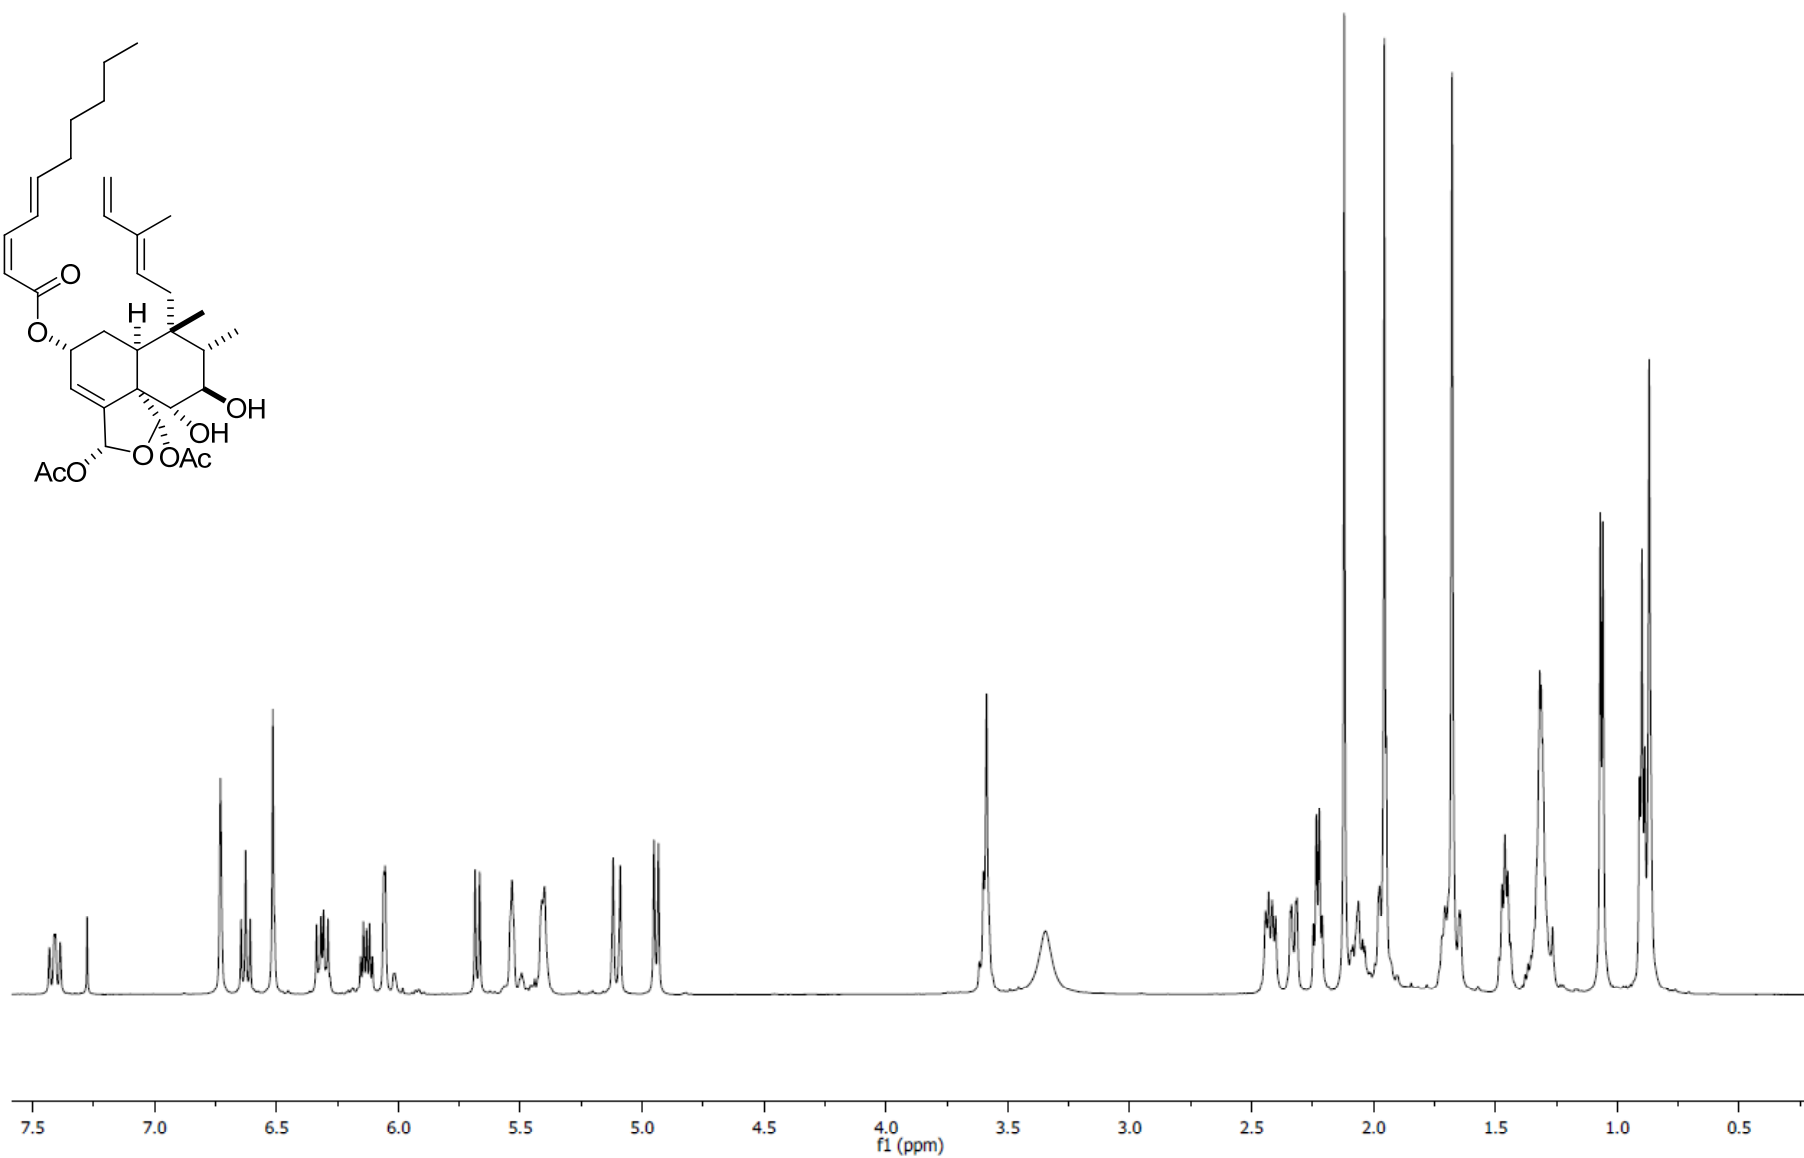

# $^{13}\text{C}$ NMR Spectrum of Argutin C (3) in $\text{CDCl}_3$

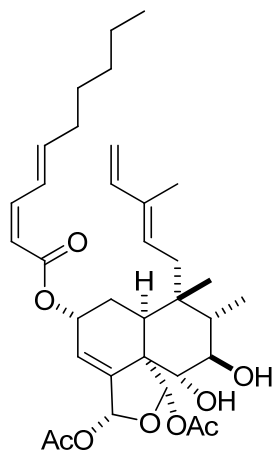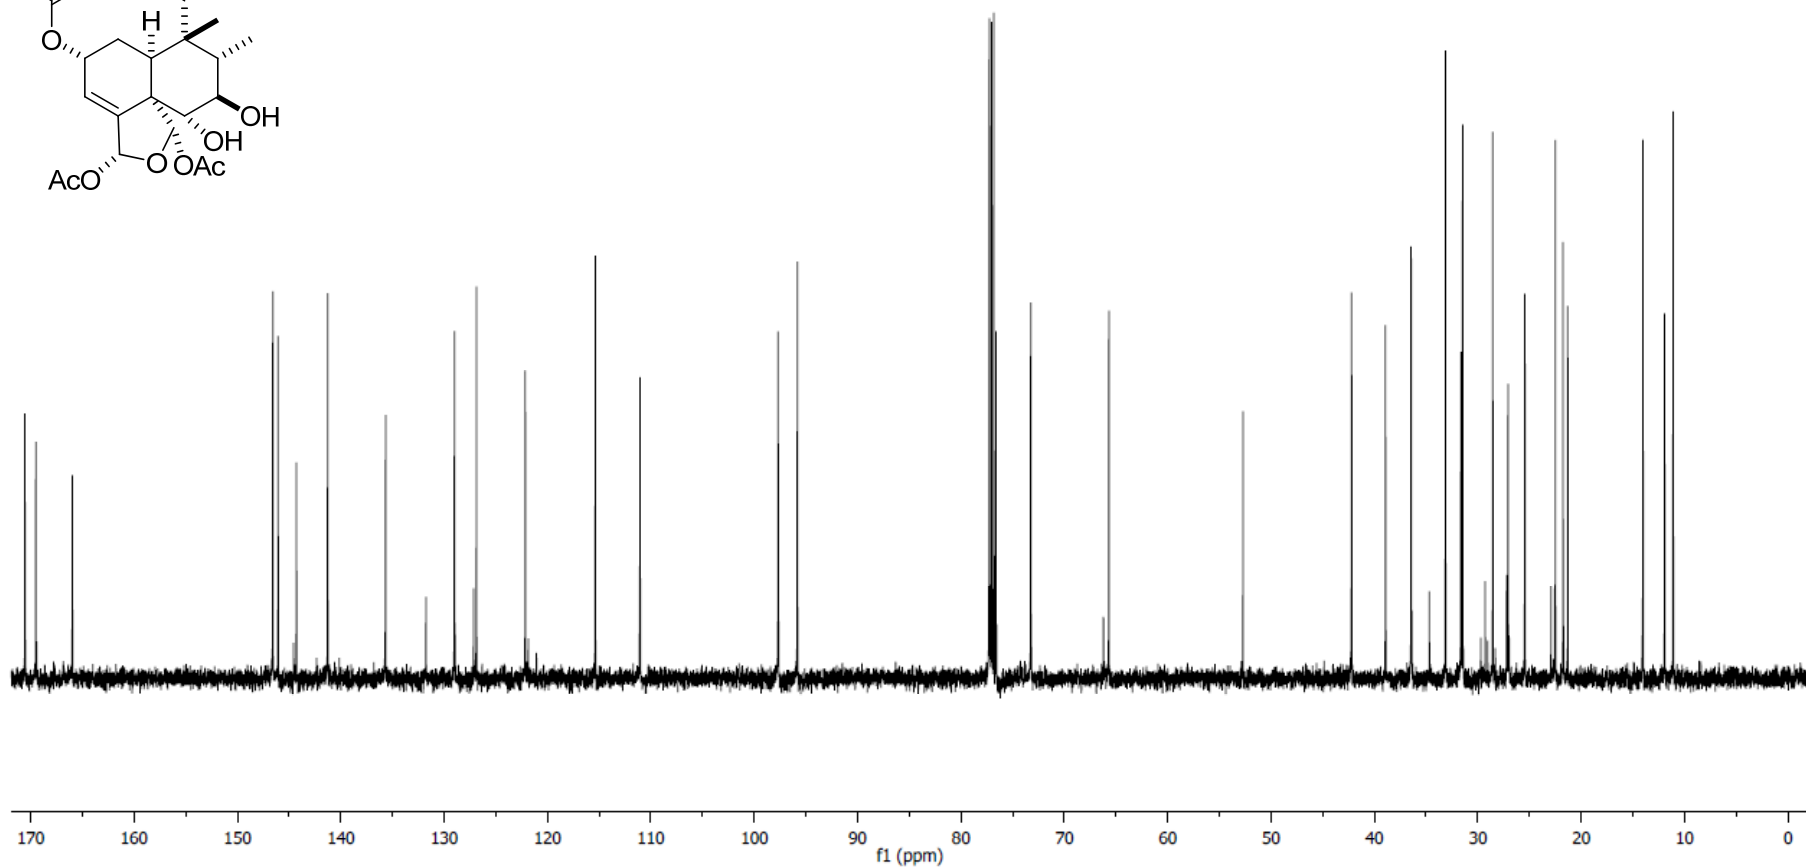

# $^1\text{H}$ NMR Spectrum of Argutin D (4) in $\text{CDCl}_3$

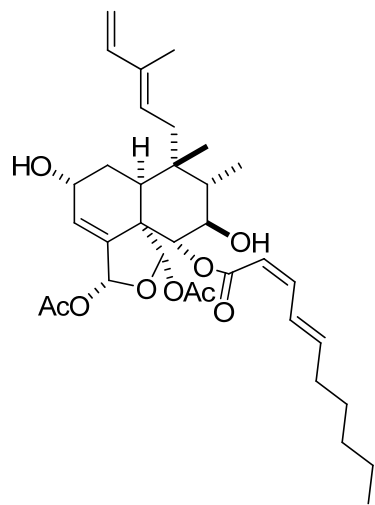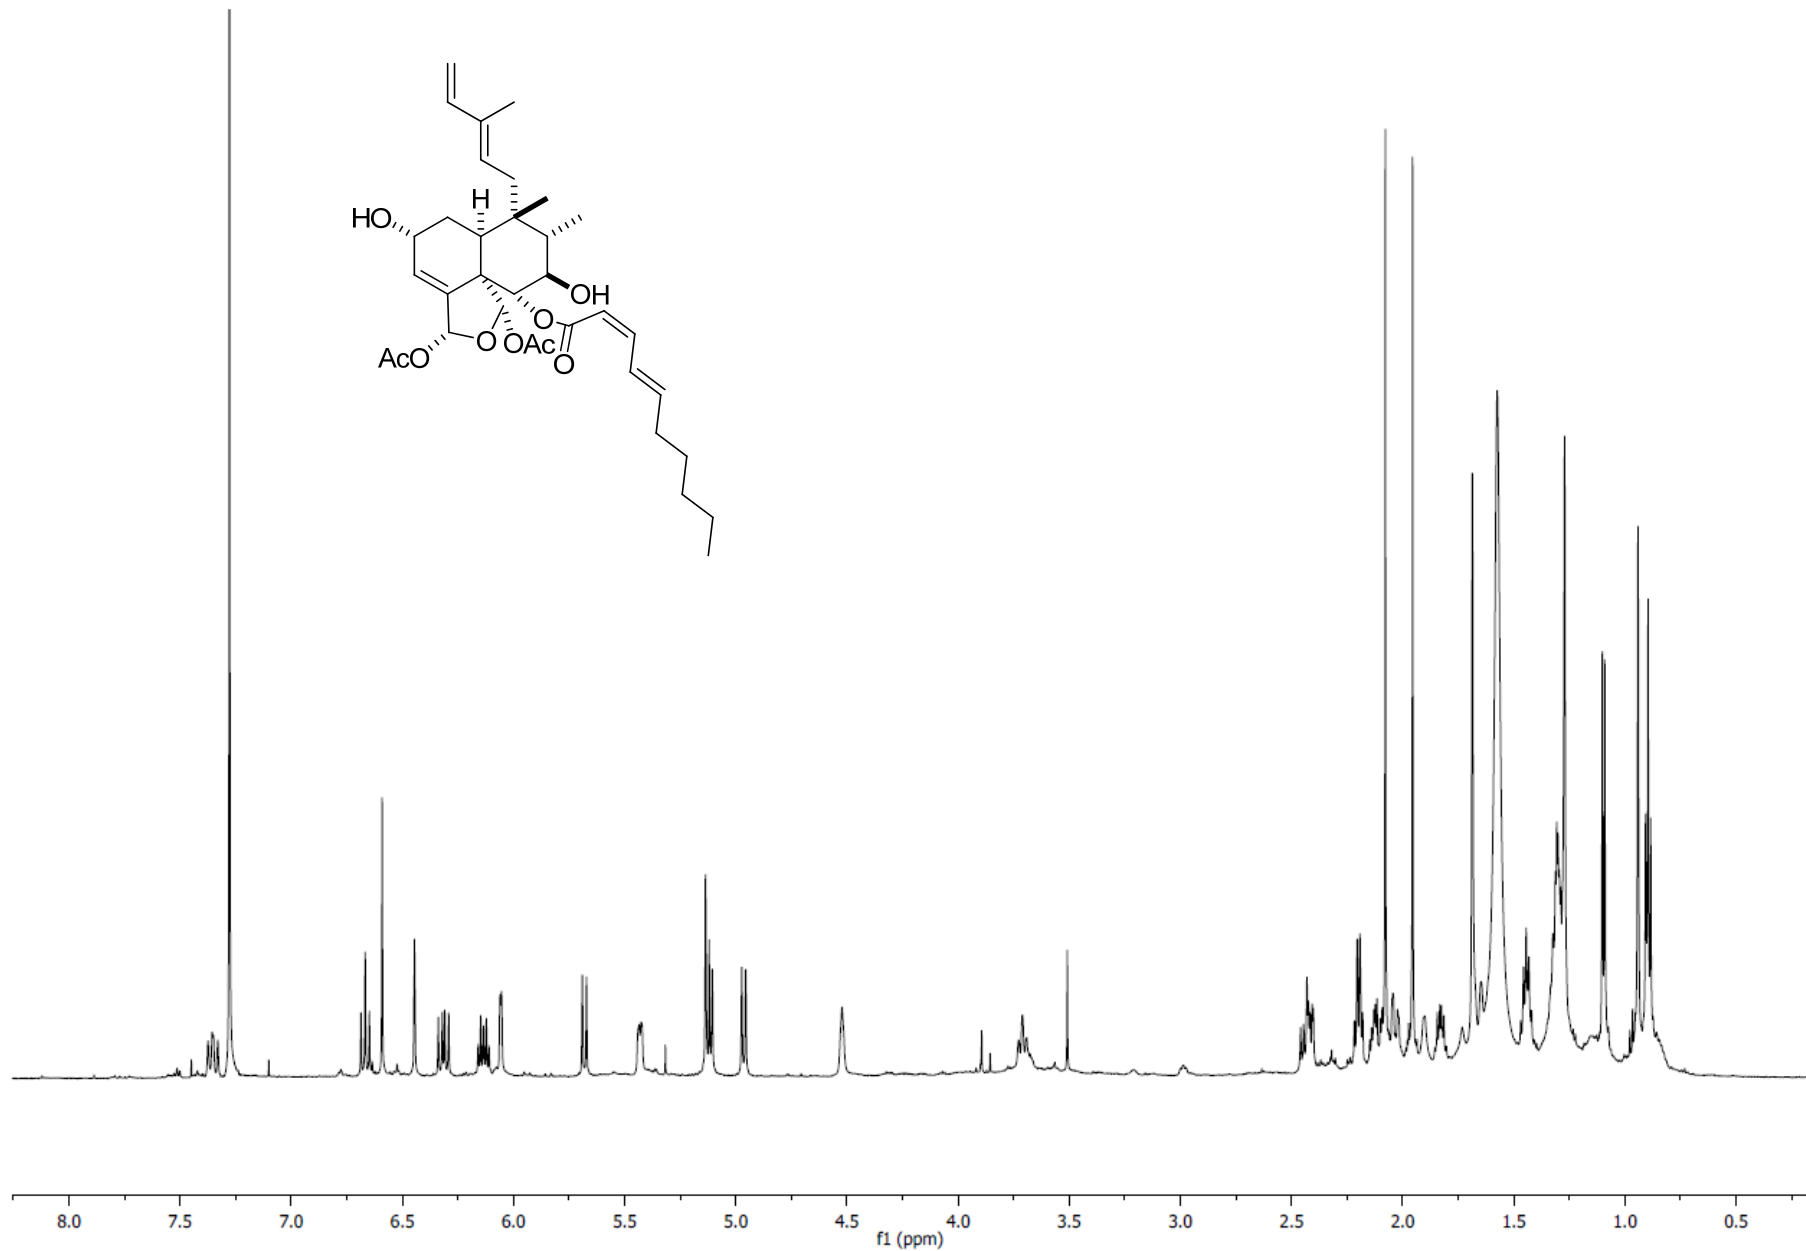



# $^{13}\text{C}$ NMR Spectrum of Argutin D (4) in $\text{CDCl}_3$

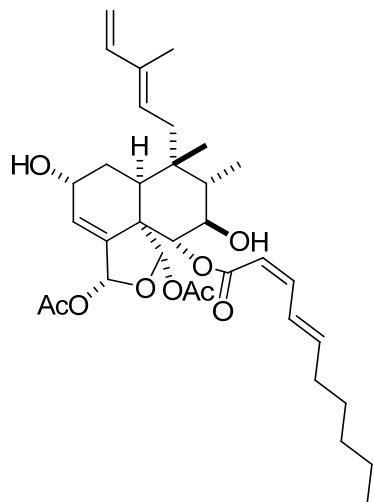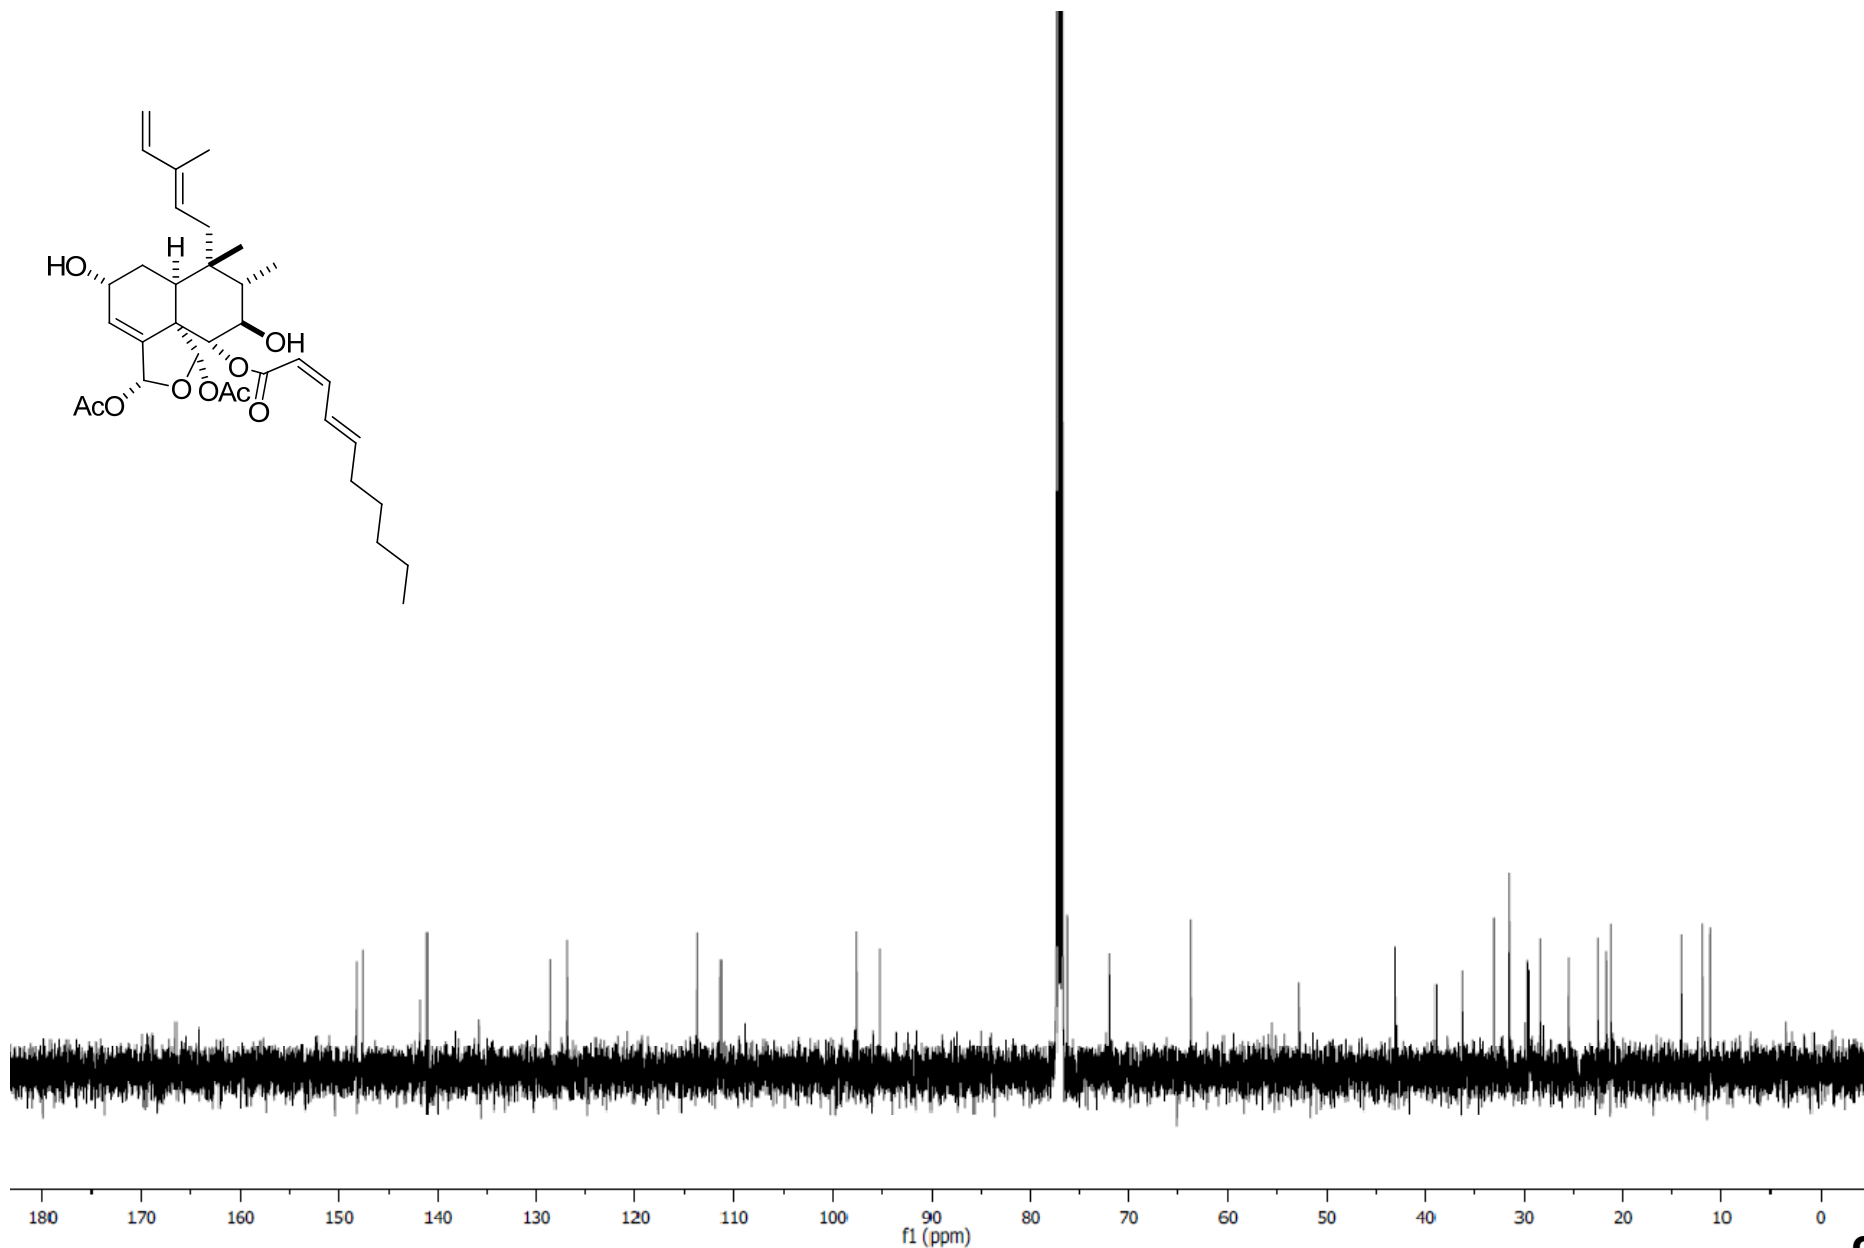

# $^1\text{H}$ NMR Spectrum of Argutin E (**5**) in $\text{CDCl}_3$

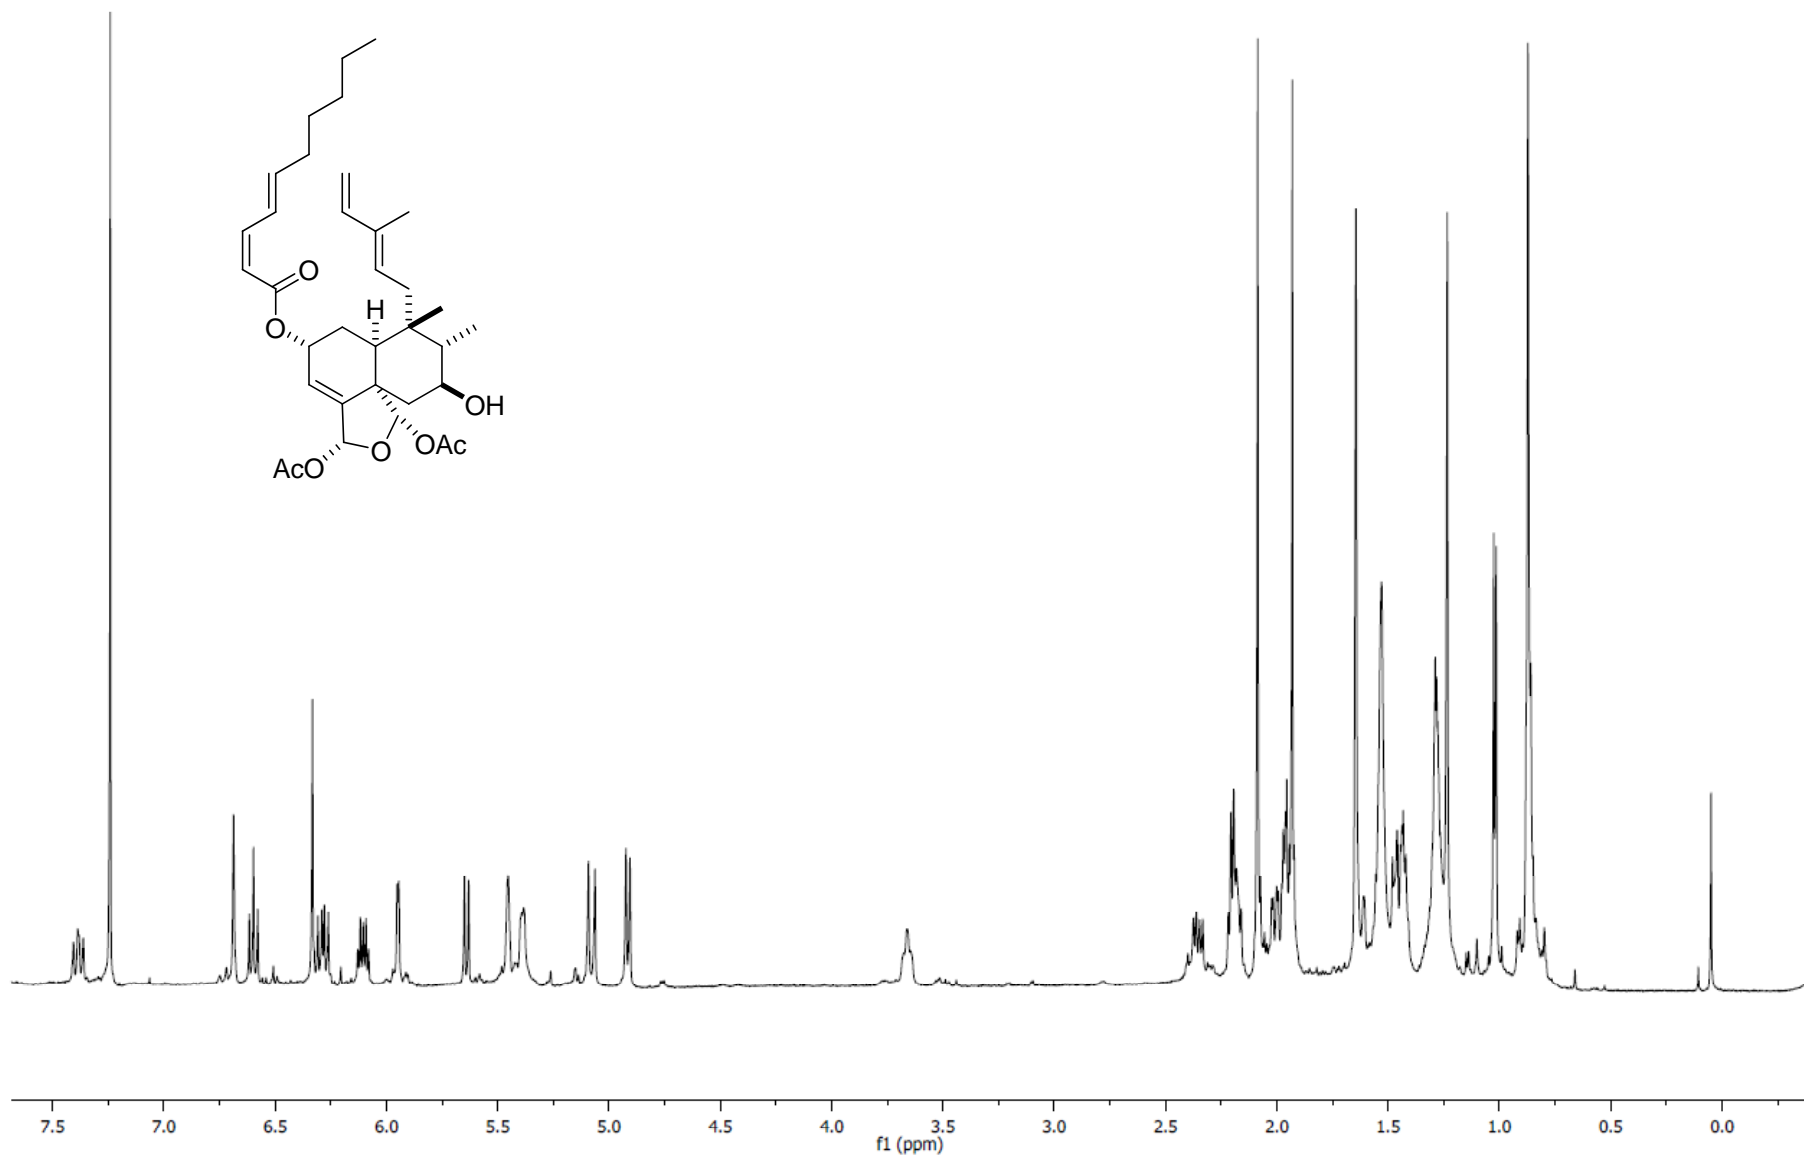

# $^{13}\text{C}$ NMR Spectrum of Argutin E (5) in $\text{CDCl}_3$

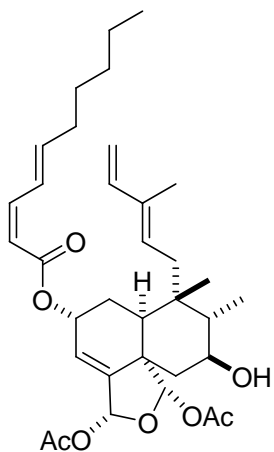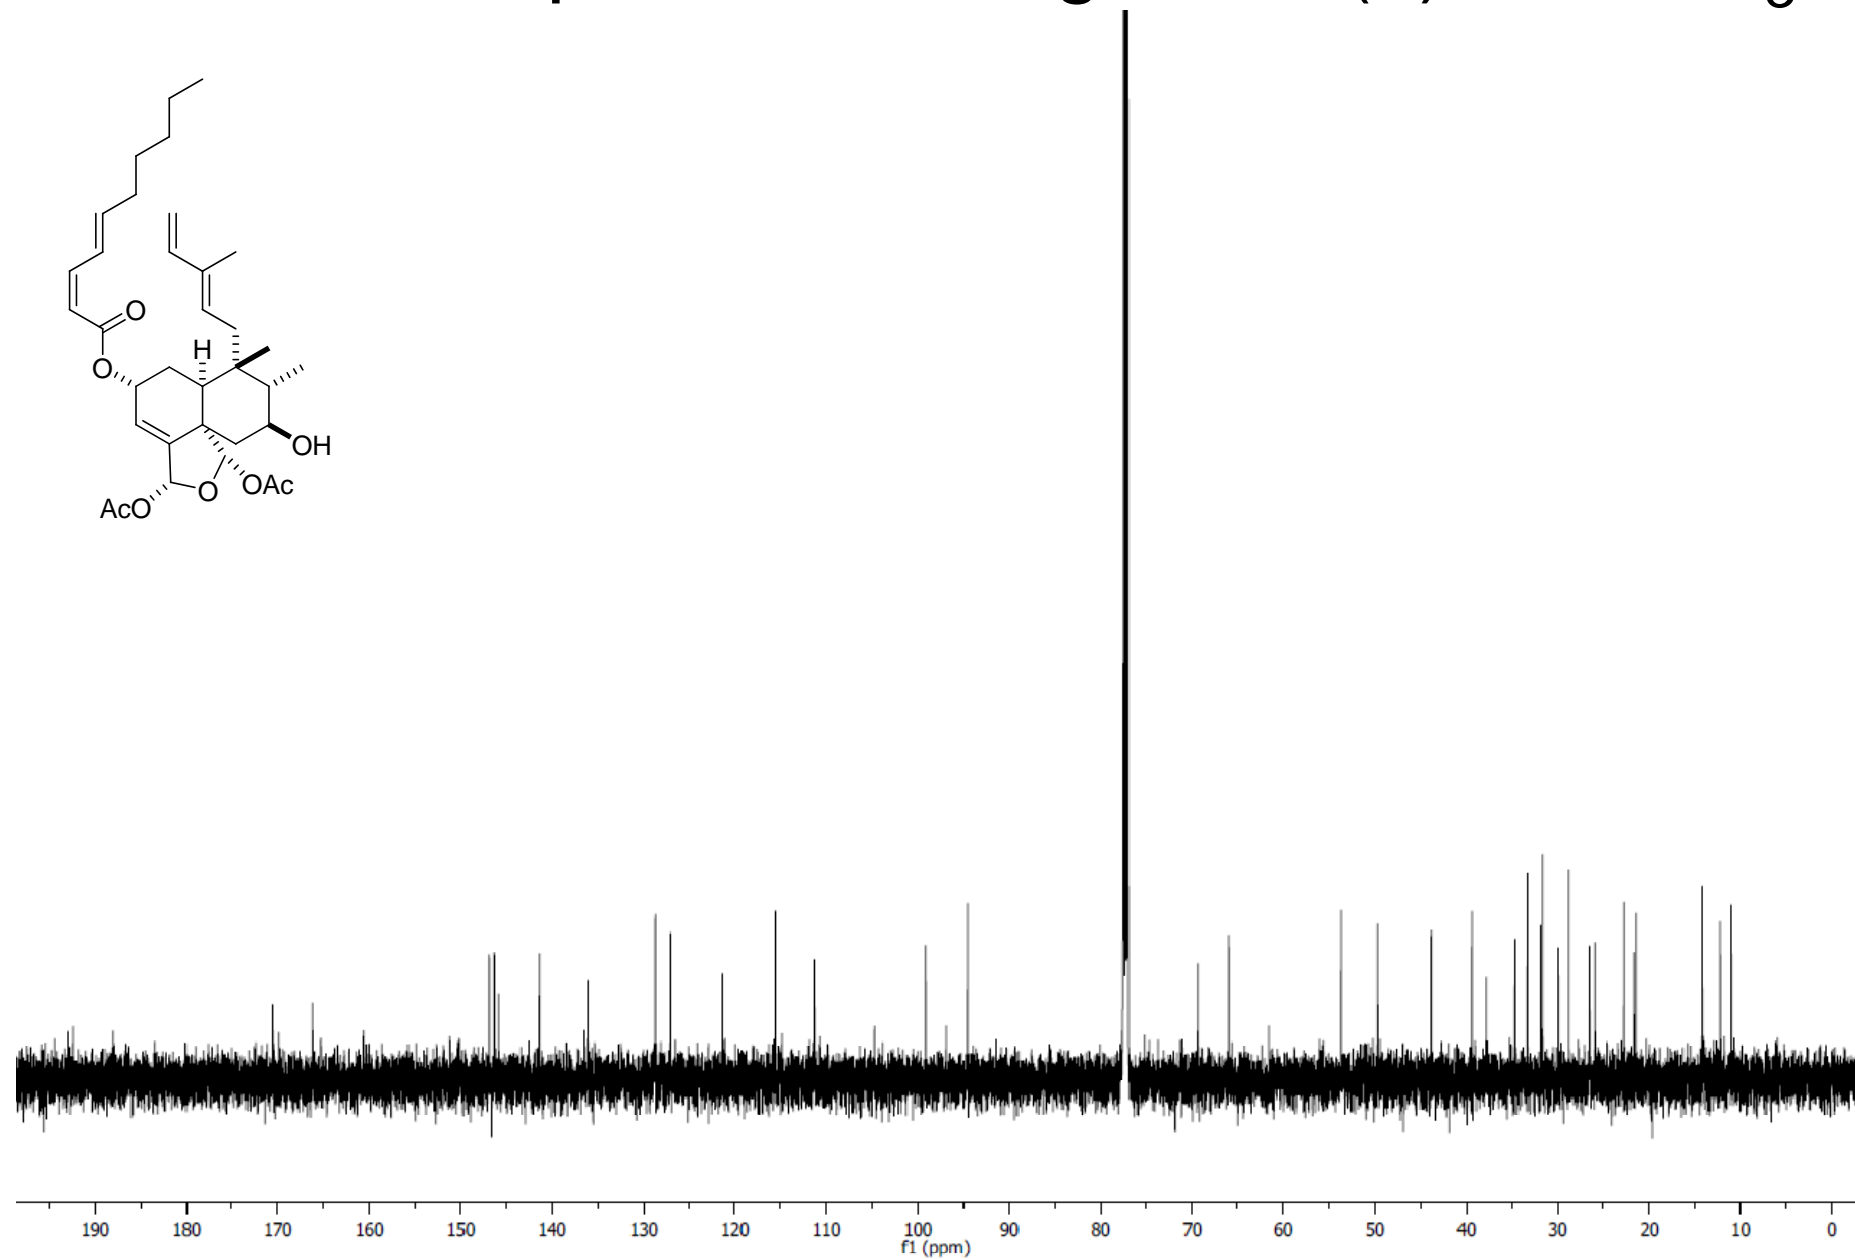

# $^1\text{H}$ NMR Spectrum of Argutin F (6) in $\text{CDCl}_3$

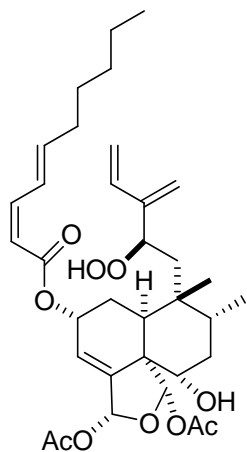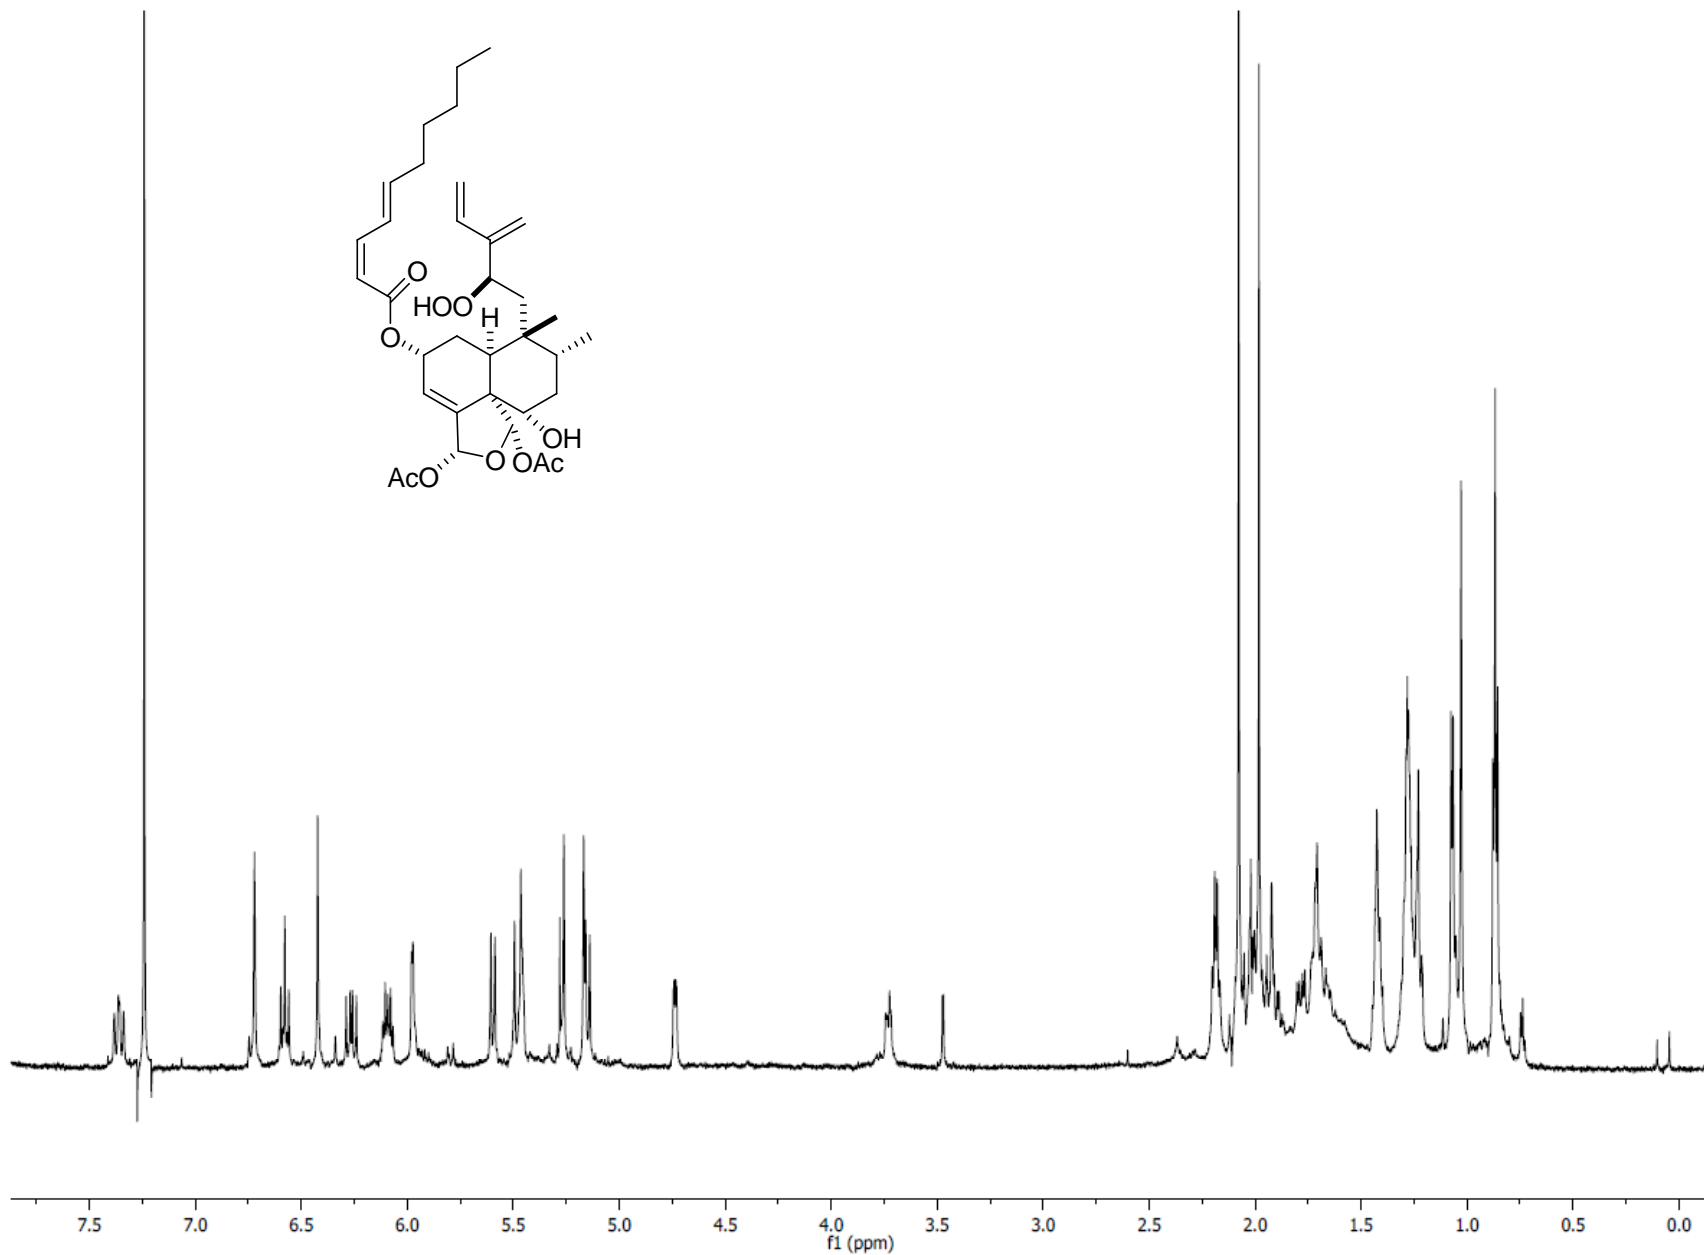

# HSQC Spectrum of Argutin F (6) in CDCl<sub>3</sub>

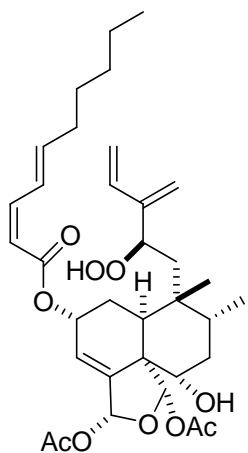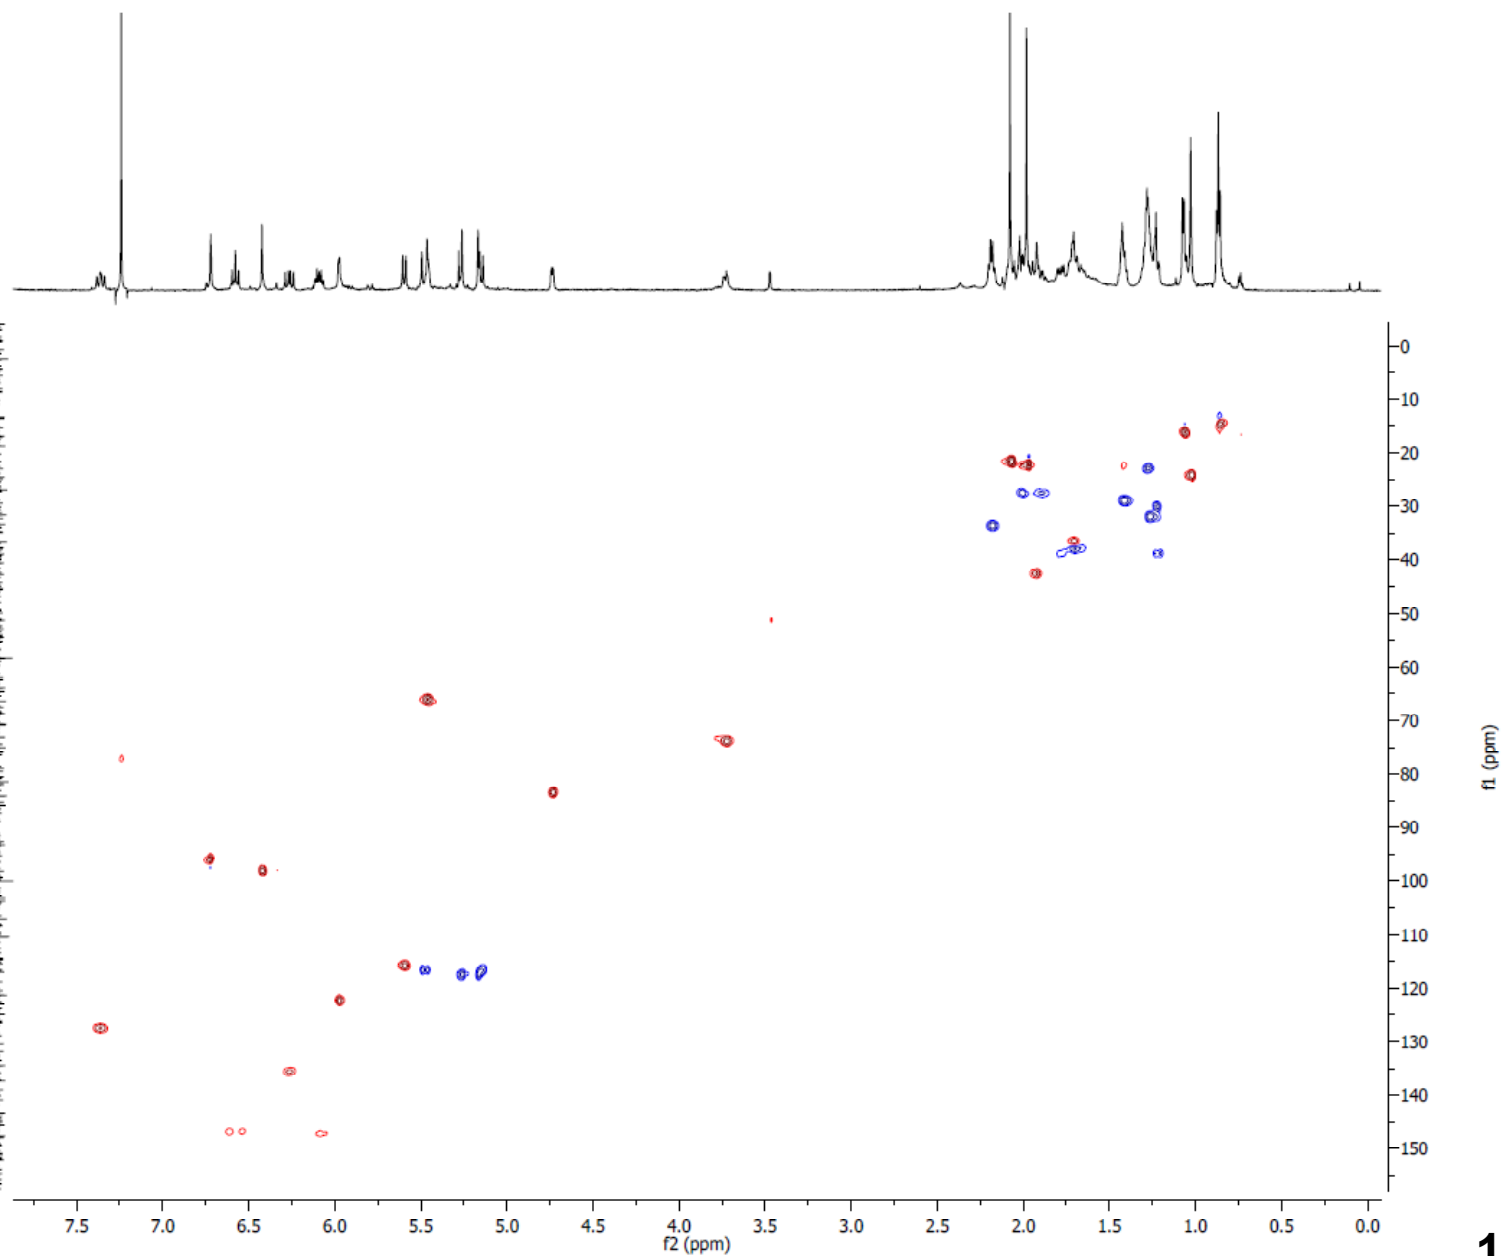

# $^1\text{H}$ NMR Spectrum of Argutin G (7) in $\text{CDCl}_3$

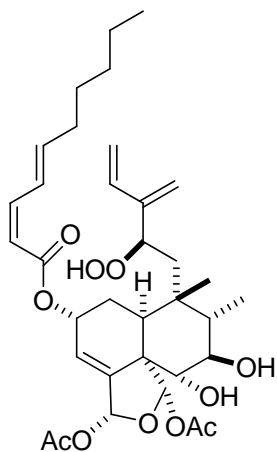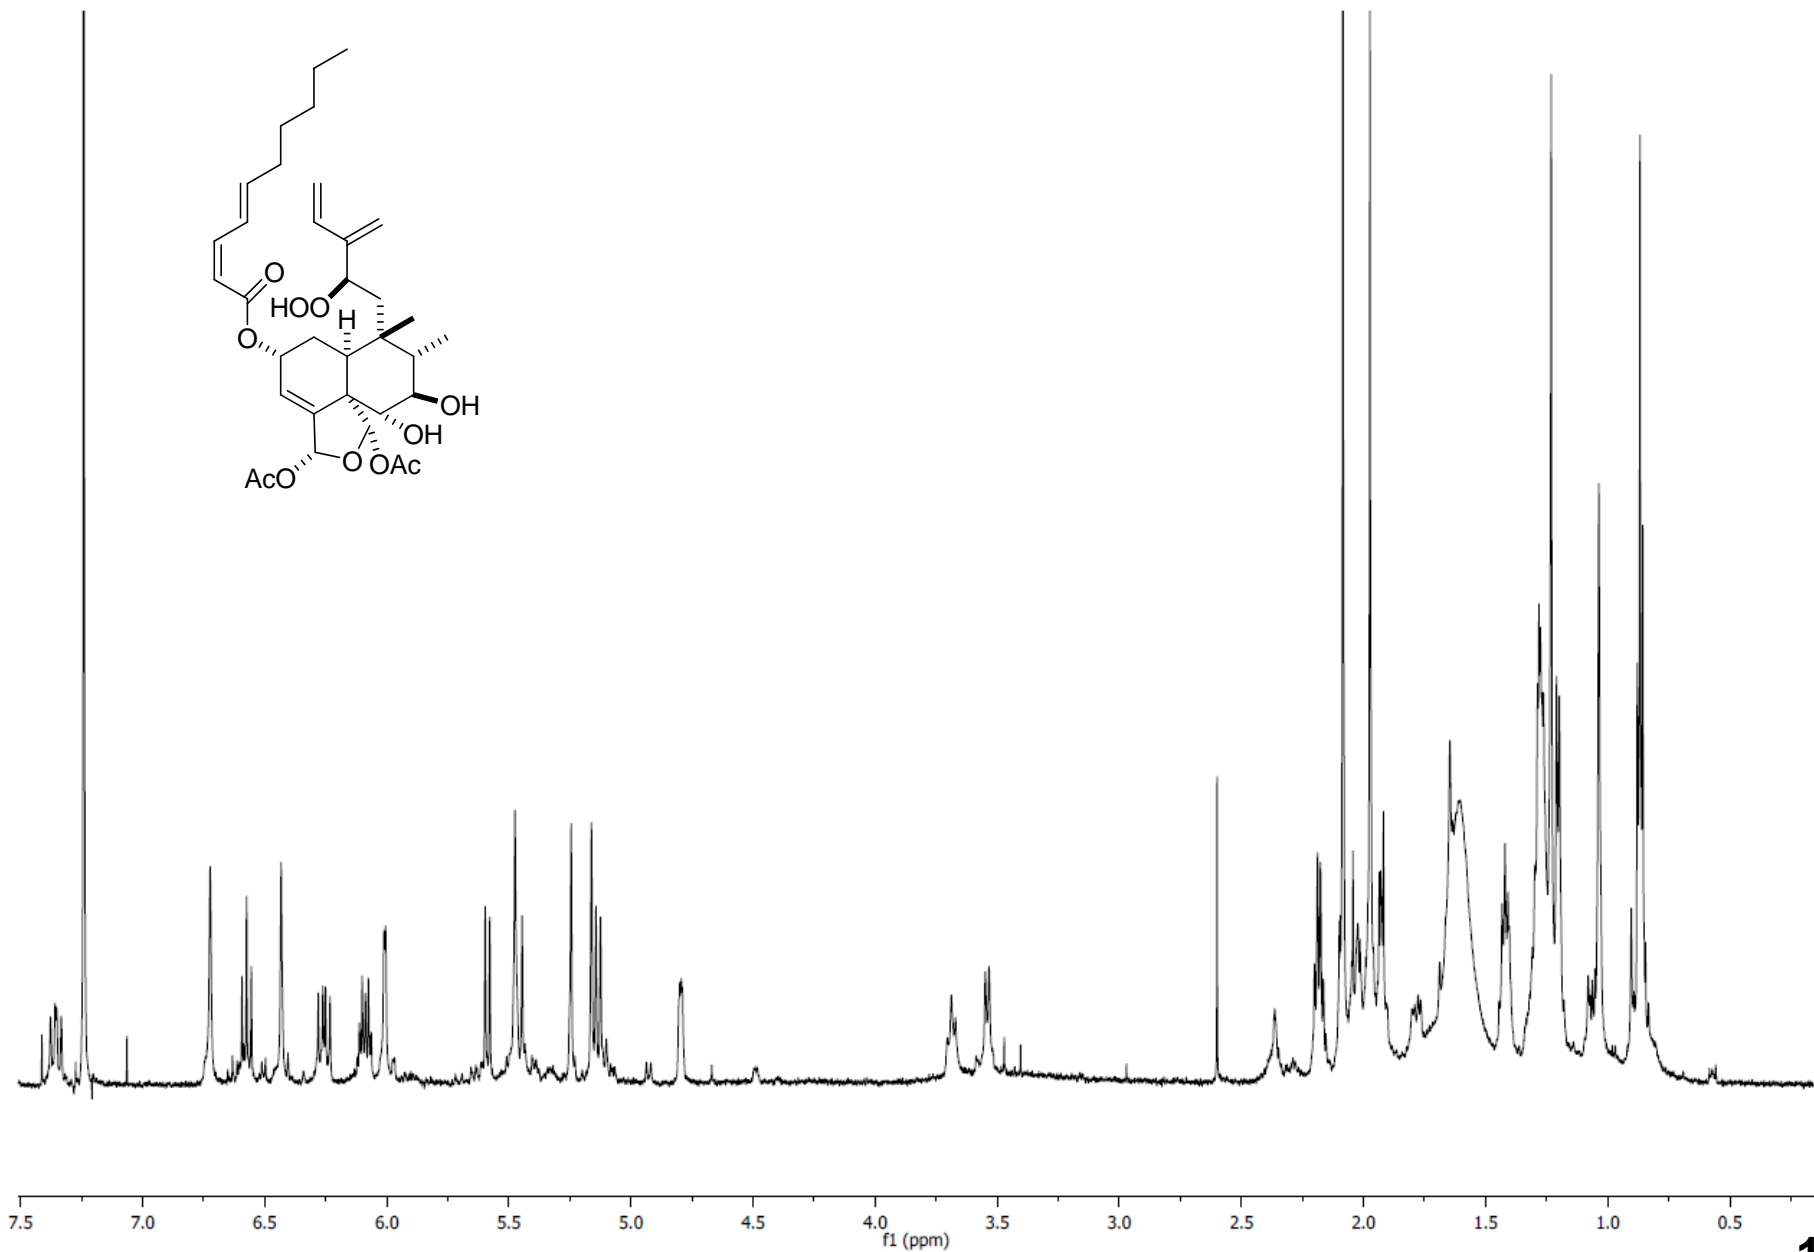

# HSQC Spectrum of Argutin G (7) in CDCl<sub>3</sub>

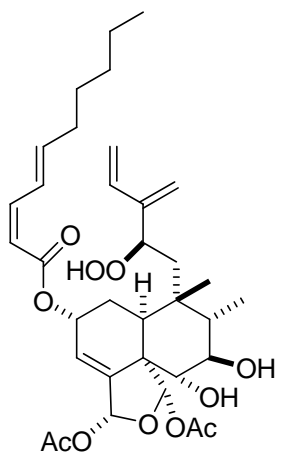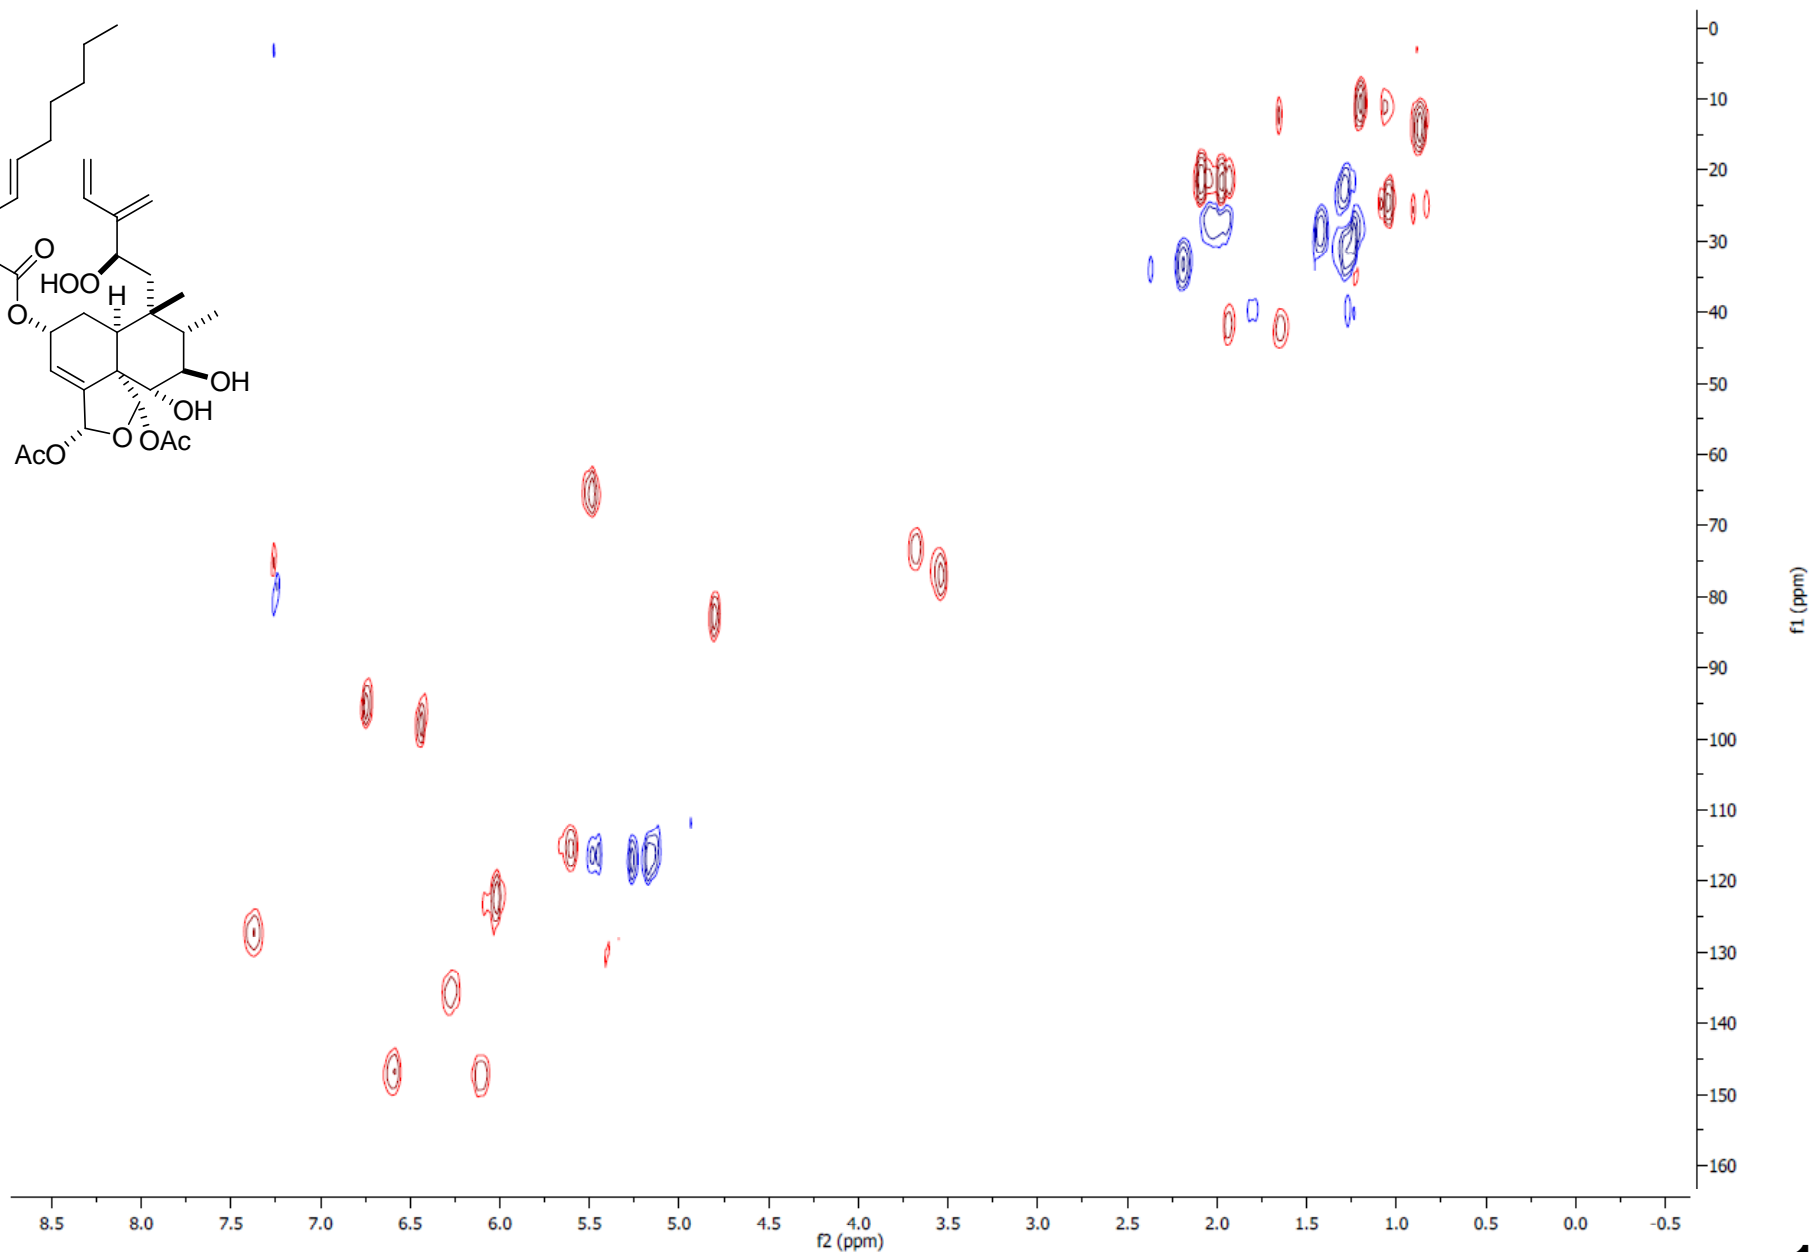

# $^1\text{H}$ NMR Spectrum of Argutin H (**8**) in $\text{CDCl}_3$

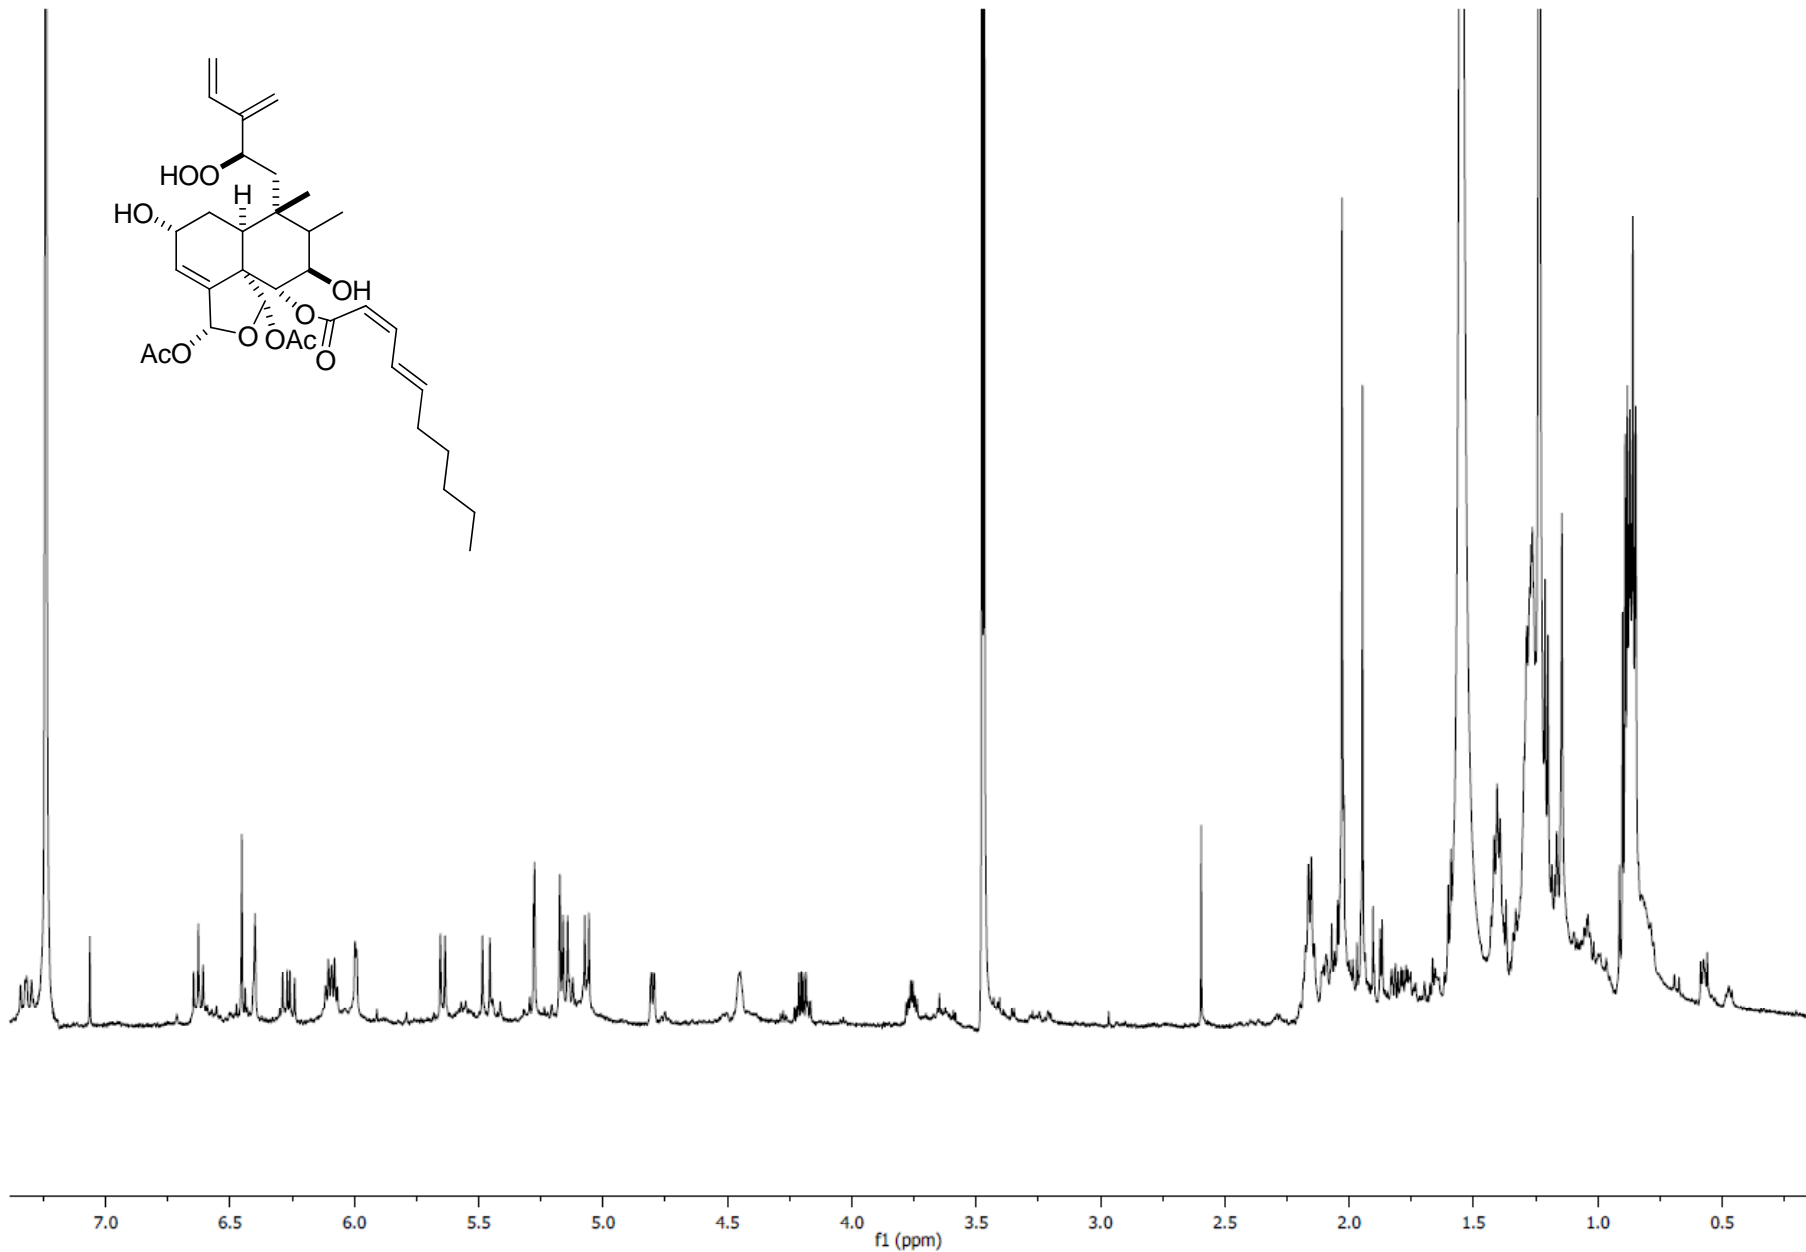



# HSQC Spectrum of Argutin H (8) in CDCl<sub>3</sub>

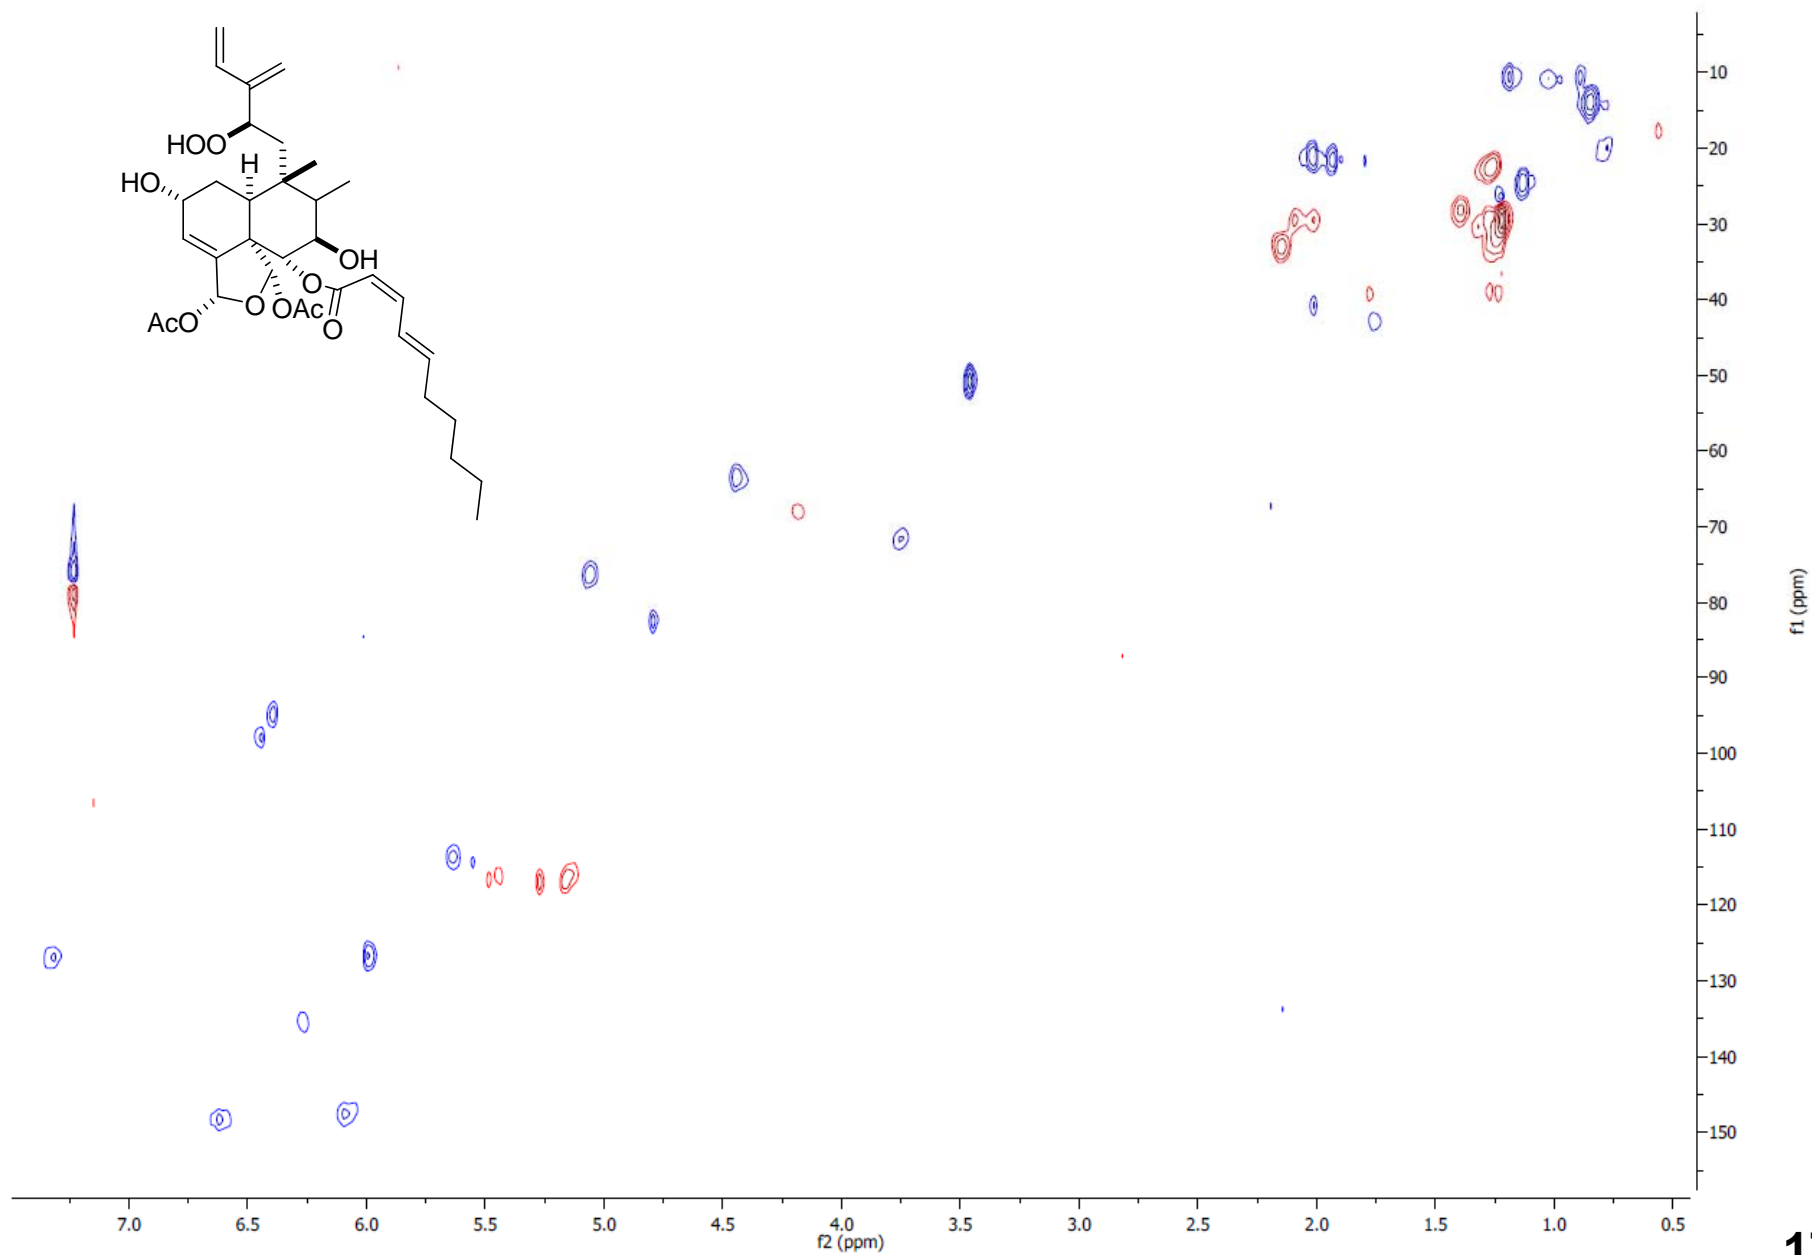

# $^1\text{H}$ NMR Spectrum of Argutin A (*S*)-MTPA Ester (**1S**) in $\text{CDCl}_3$

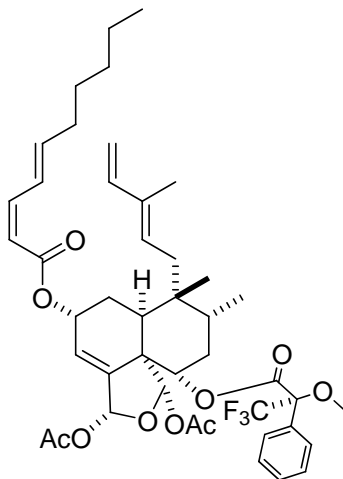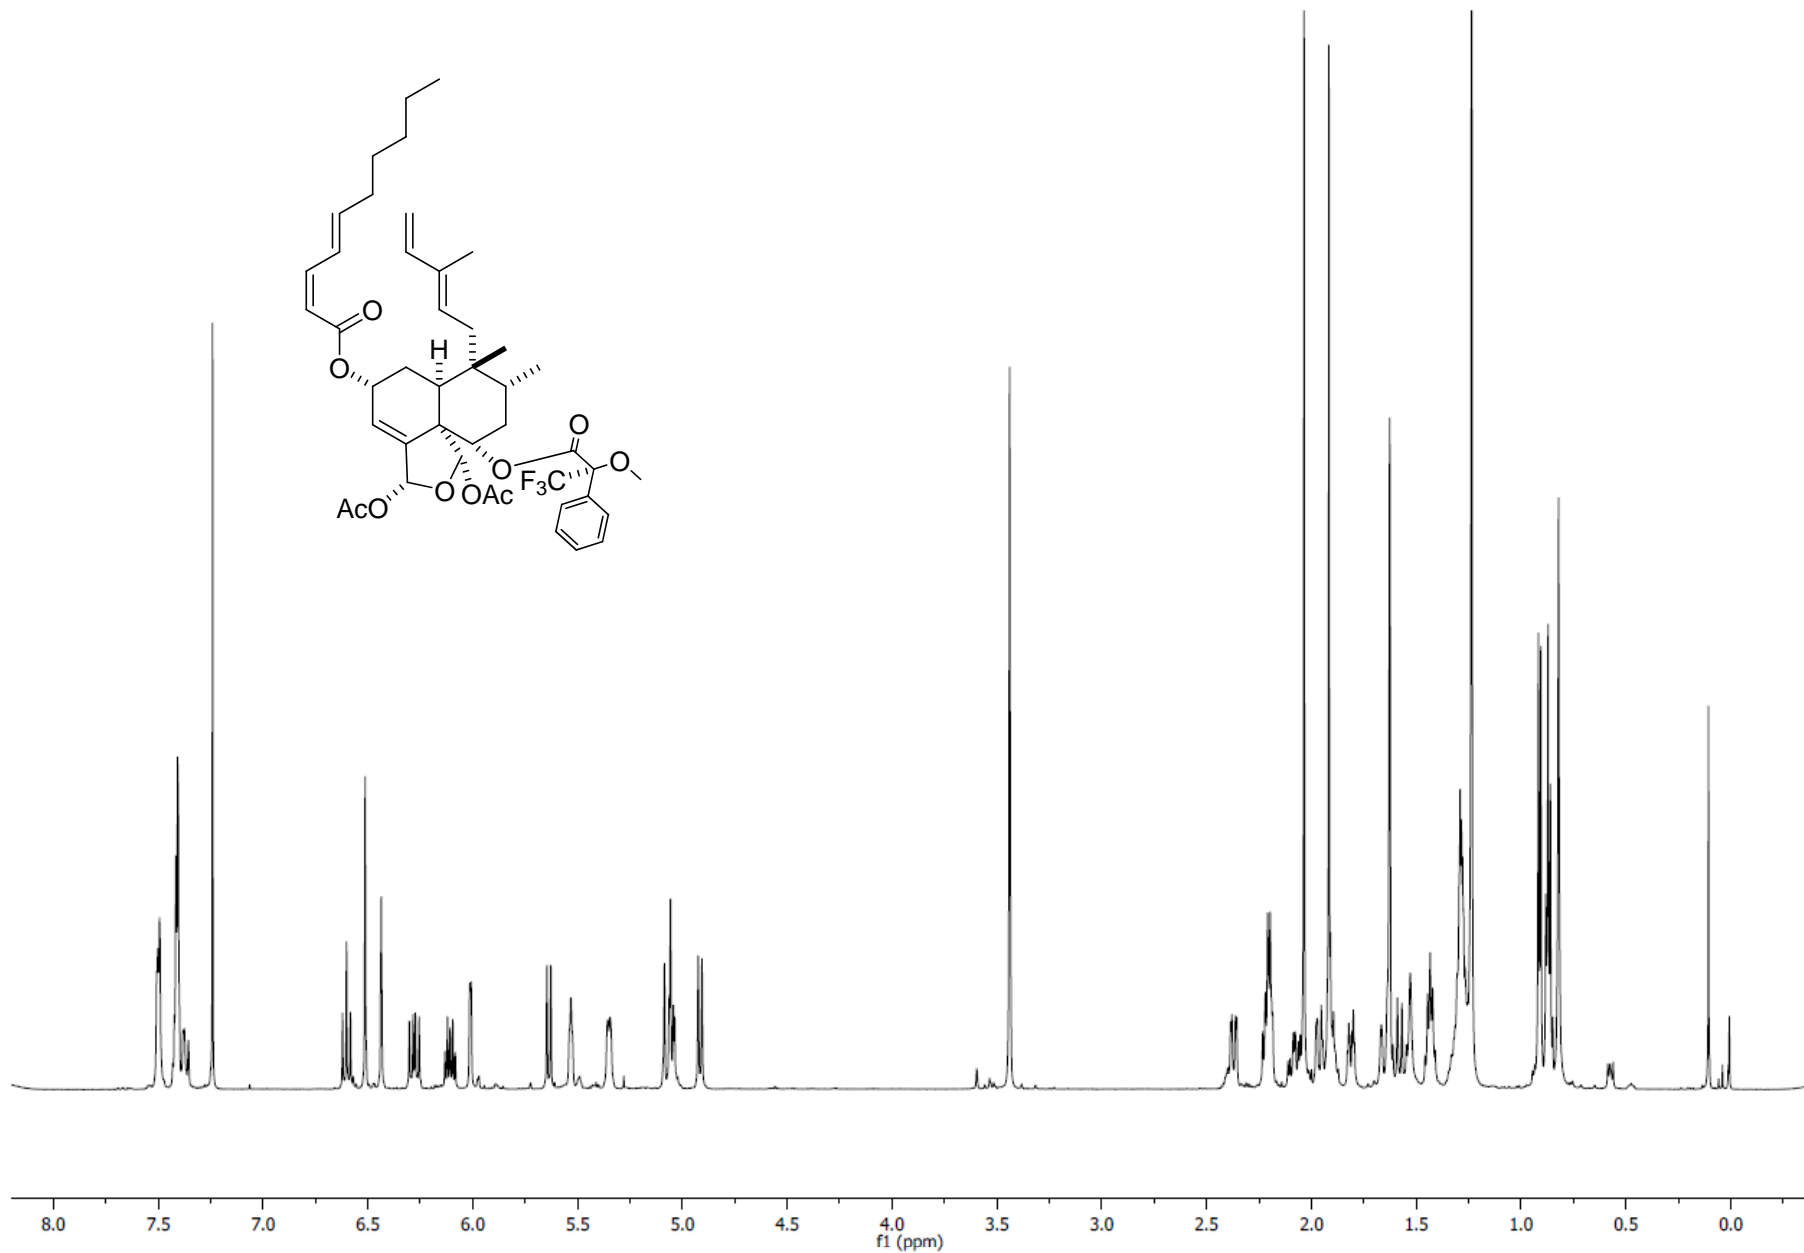

# $^{13}\text{C}$ NMR Spectrum of Argutin A (*S*)-MTPA Ester (**1S**) in $\text{CDCl}_3$

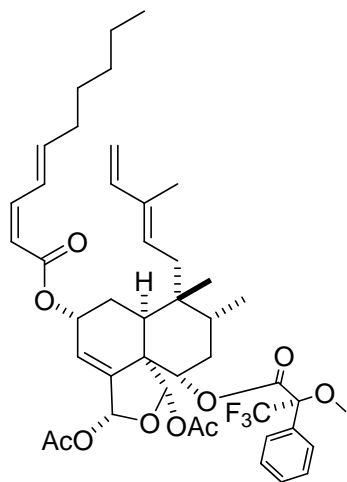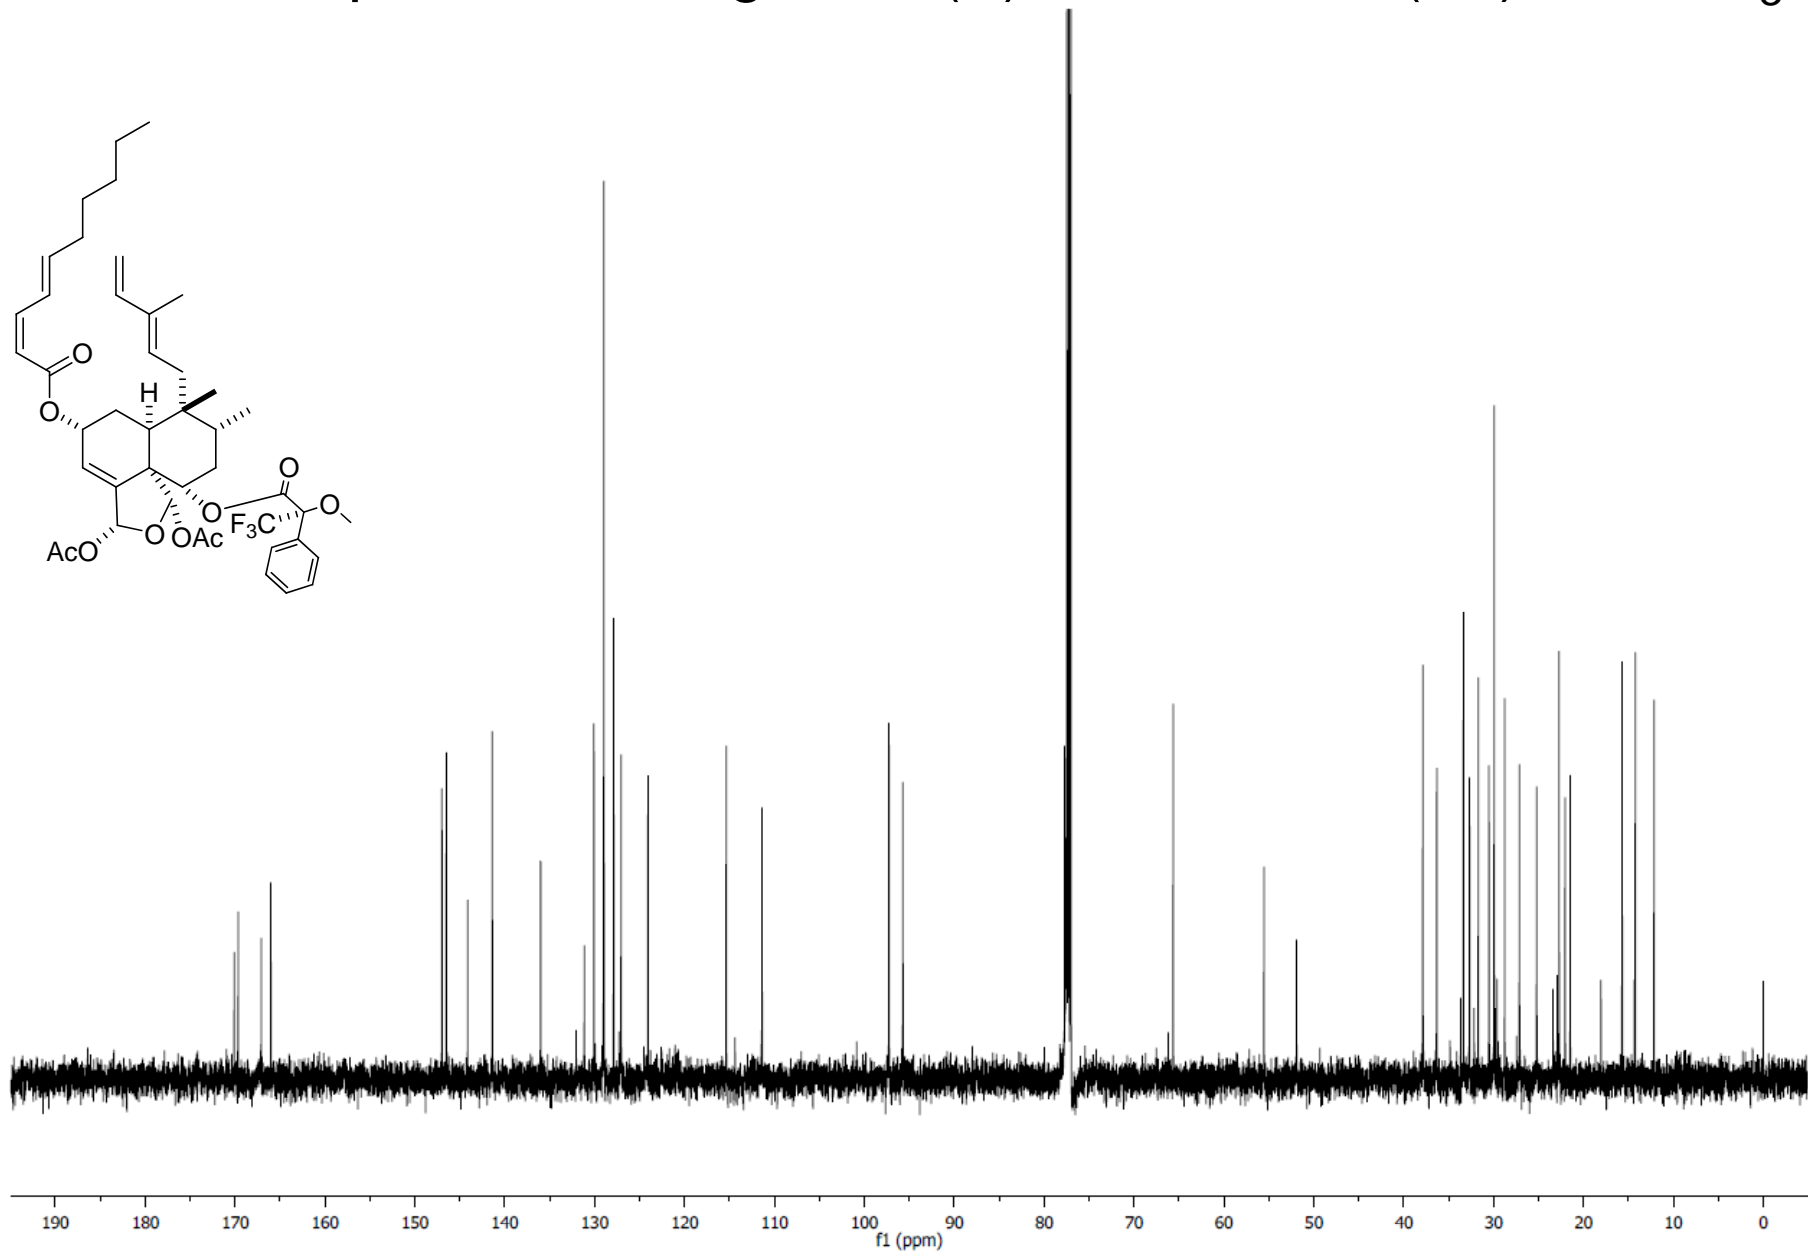

# $^1\text{H}$ NMR Spectrum of Argutin A (*R*)-MTPA Ester (**1R**) in $\text{CDCl}_3$

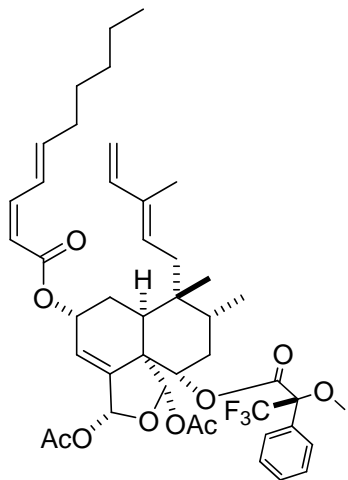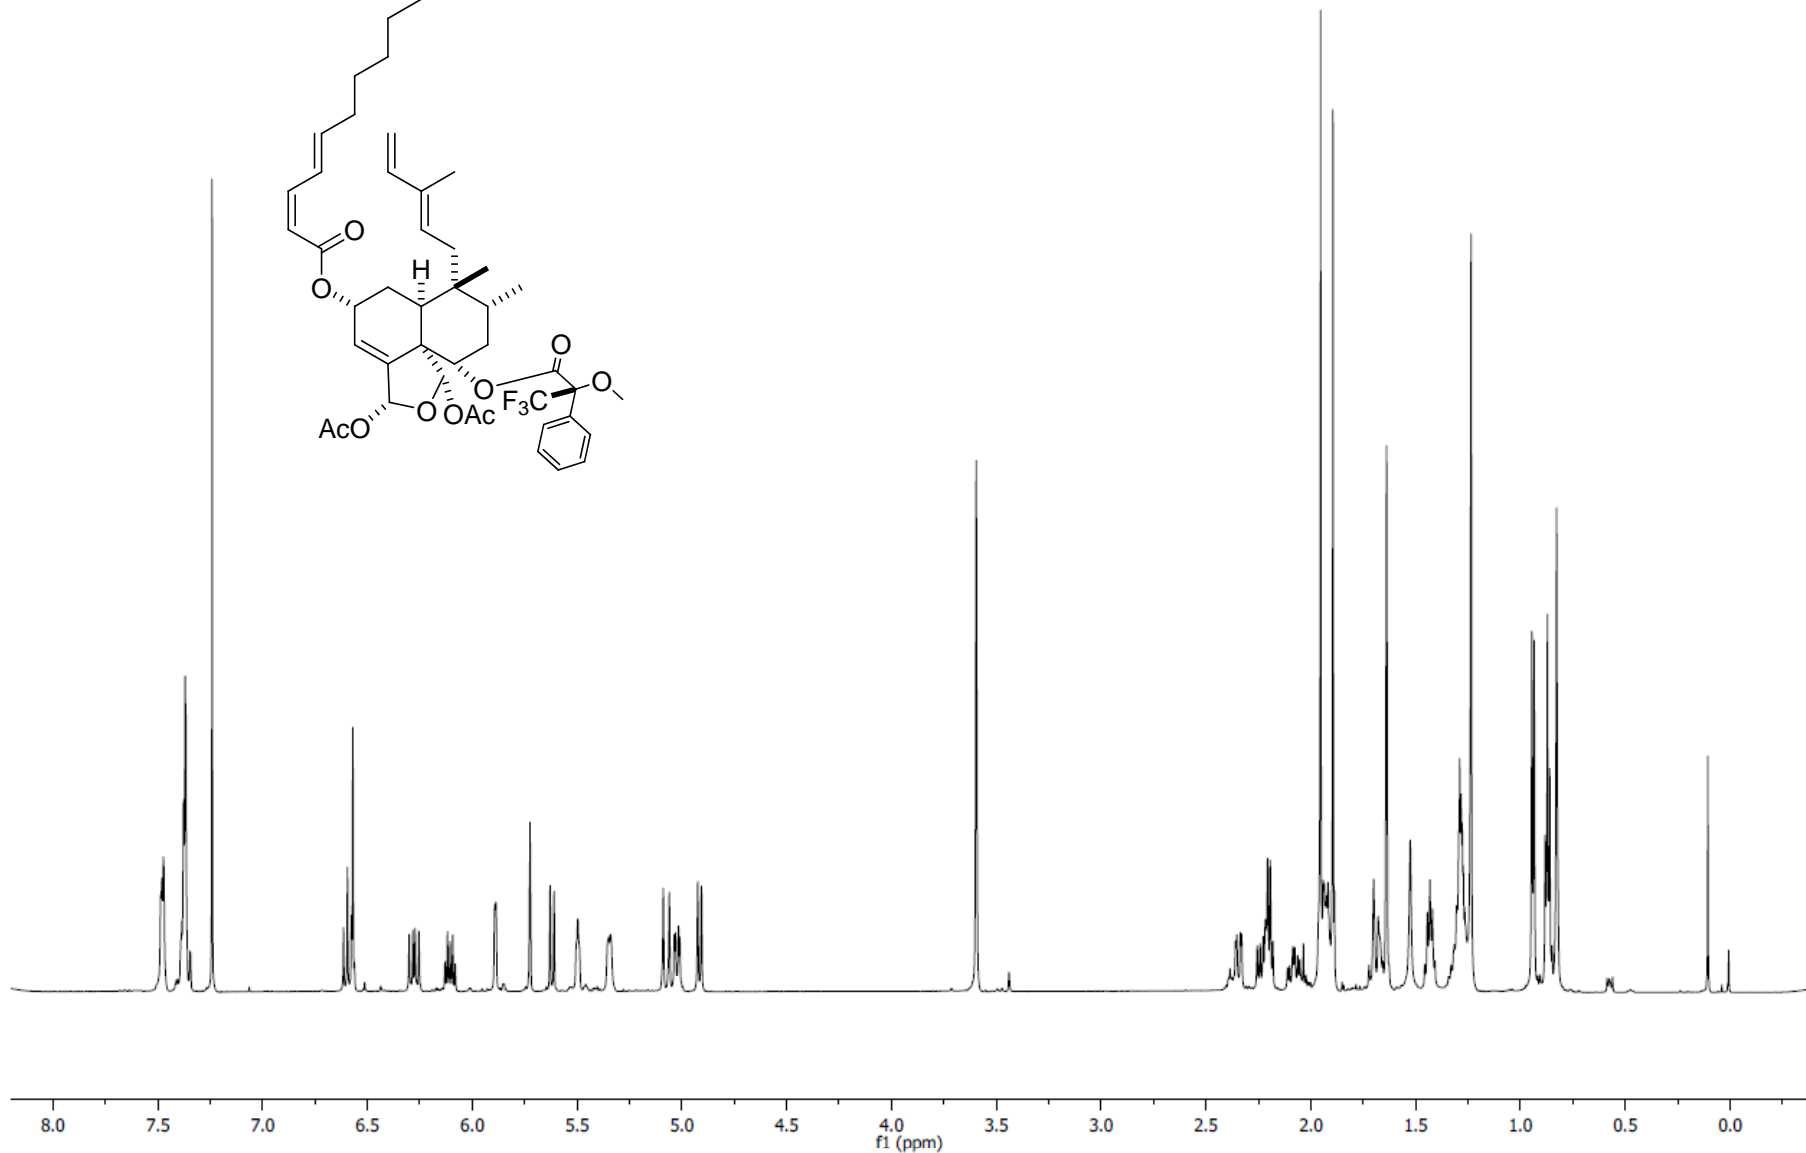

# $^{13}\text{C}$ NMR Spectrum of Argutin A (*R*)-MTPA Ester (**1R**) in $\text{CDCl}_3$

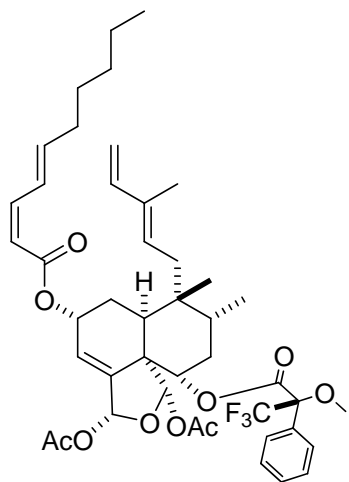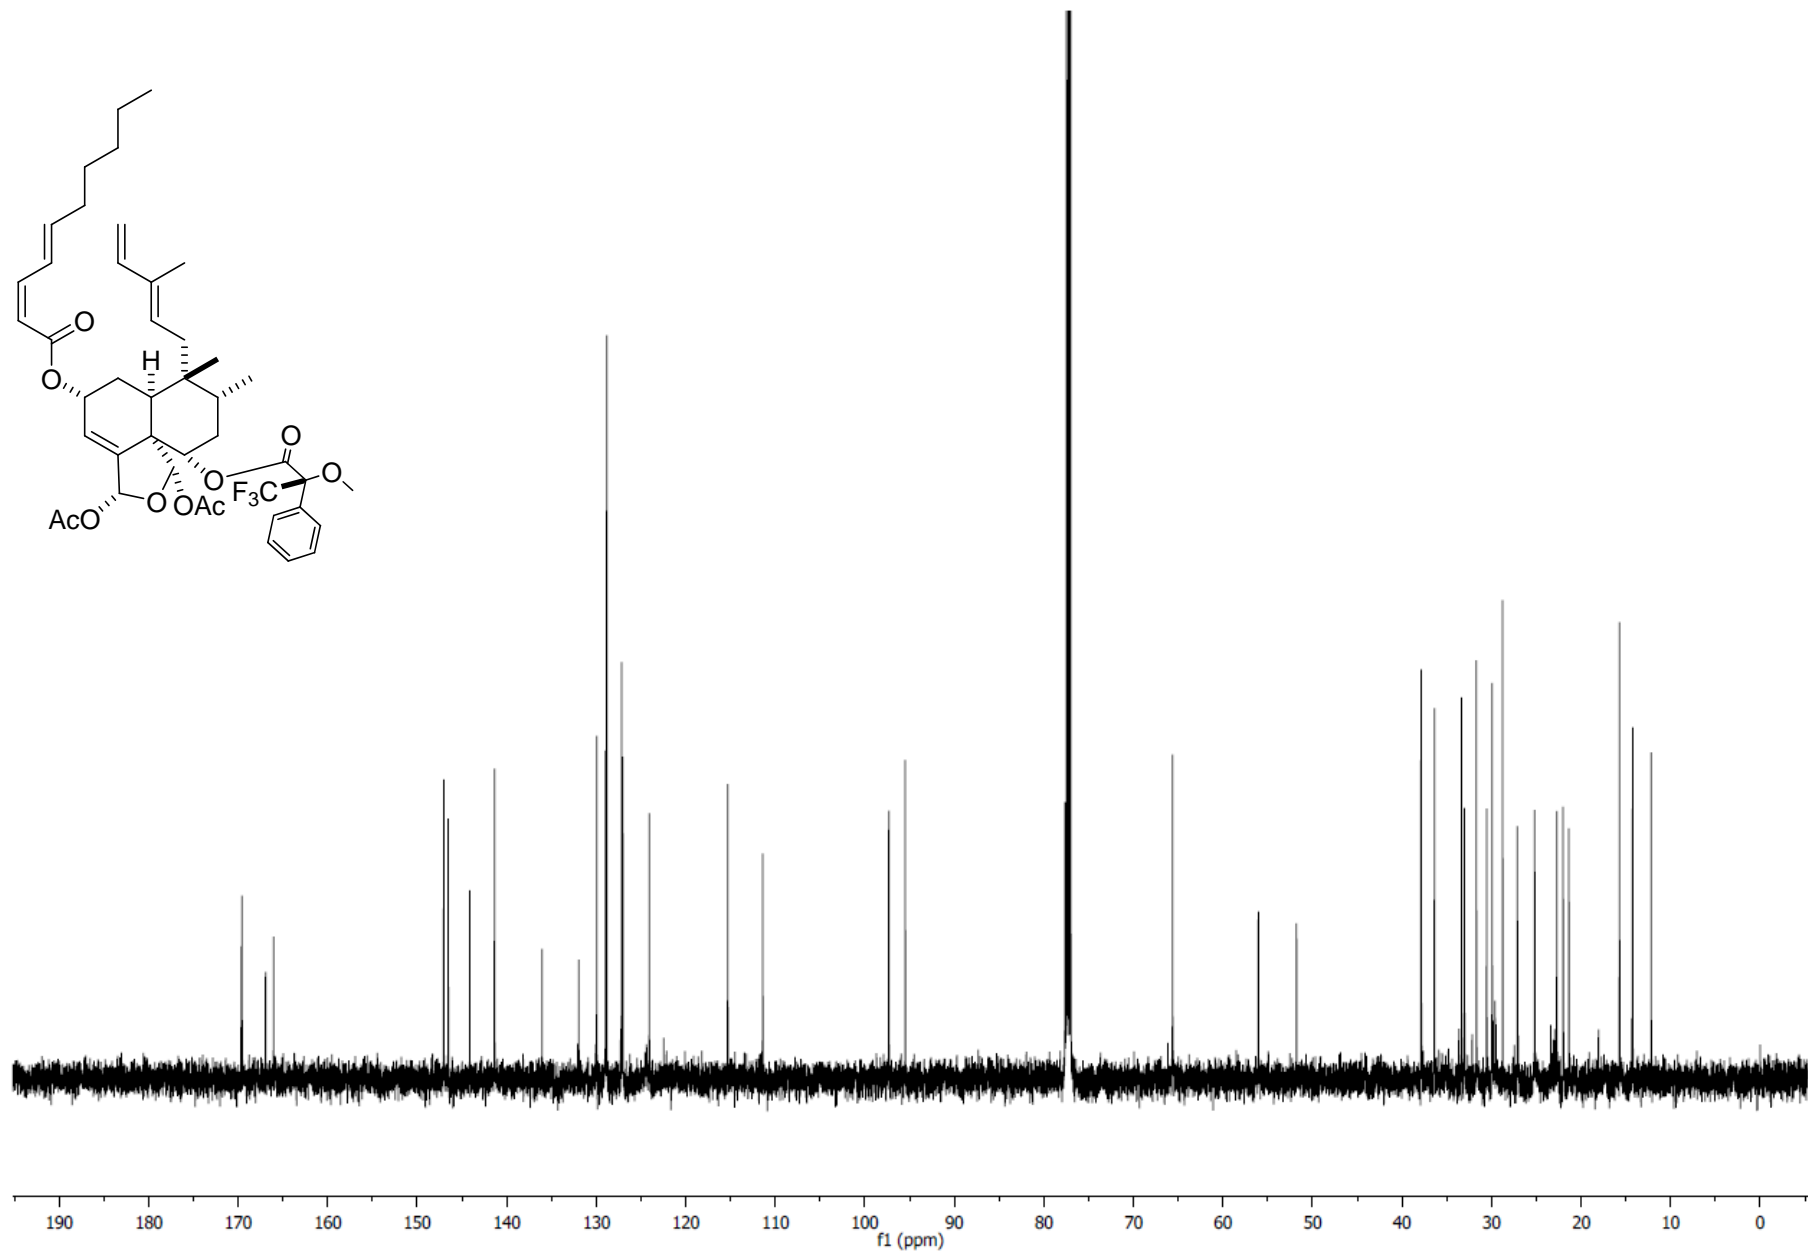

# $^1\text{H}$ NMR Spectrum of Deoxoargutin F (9) in $\text{CDCl}_3$

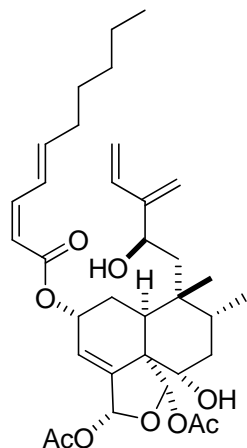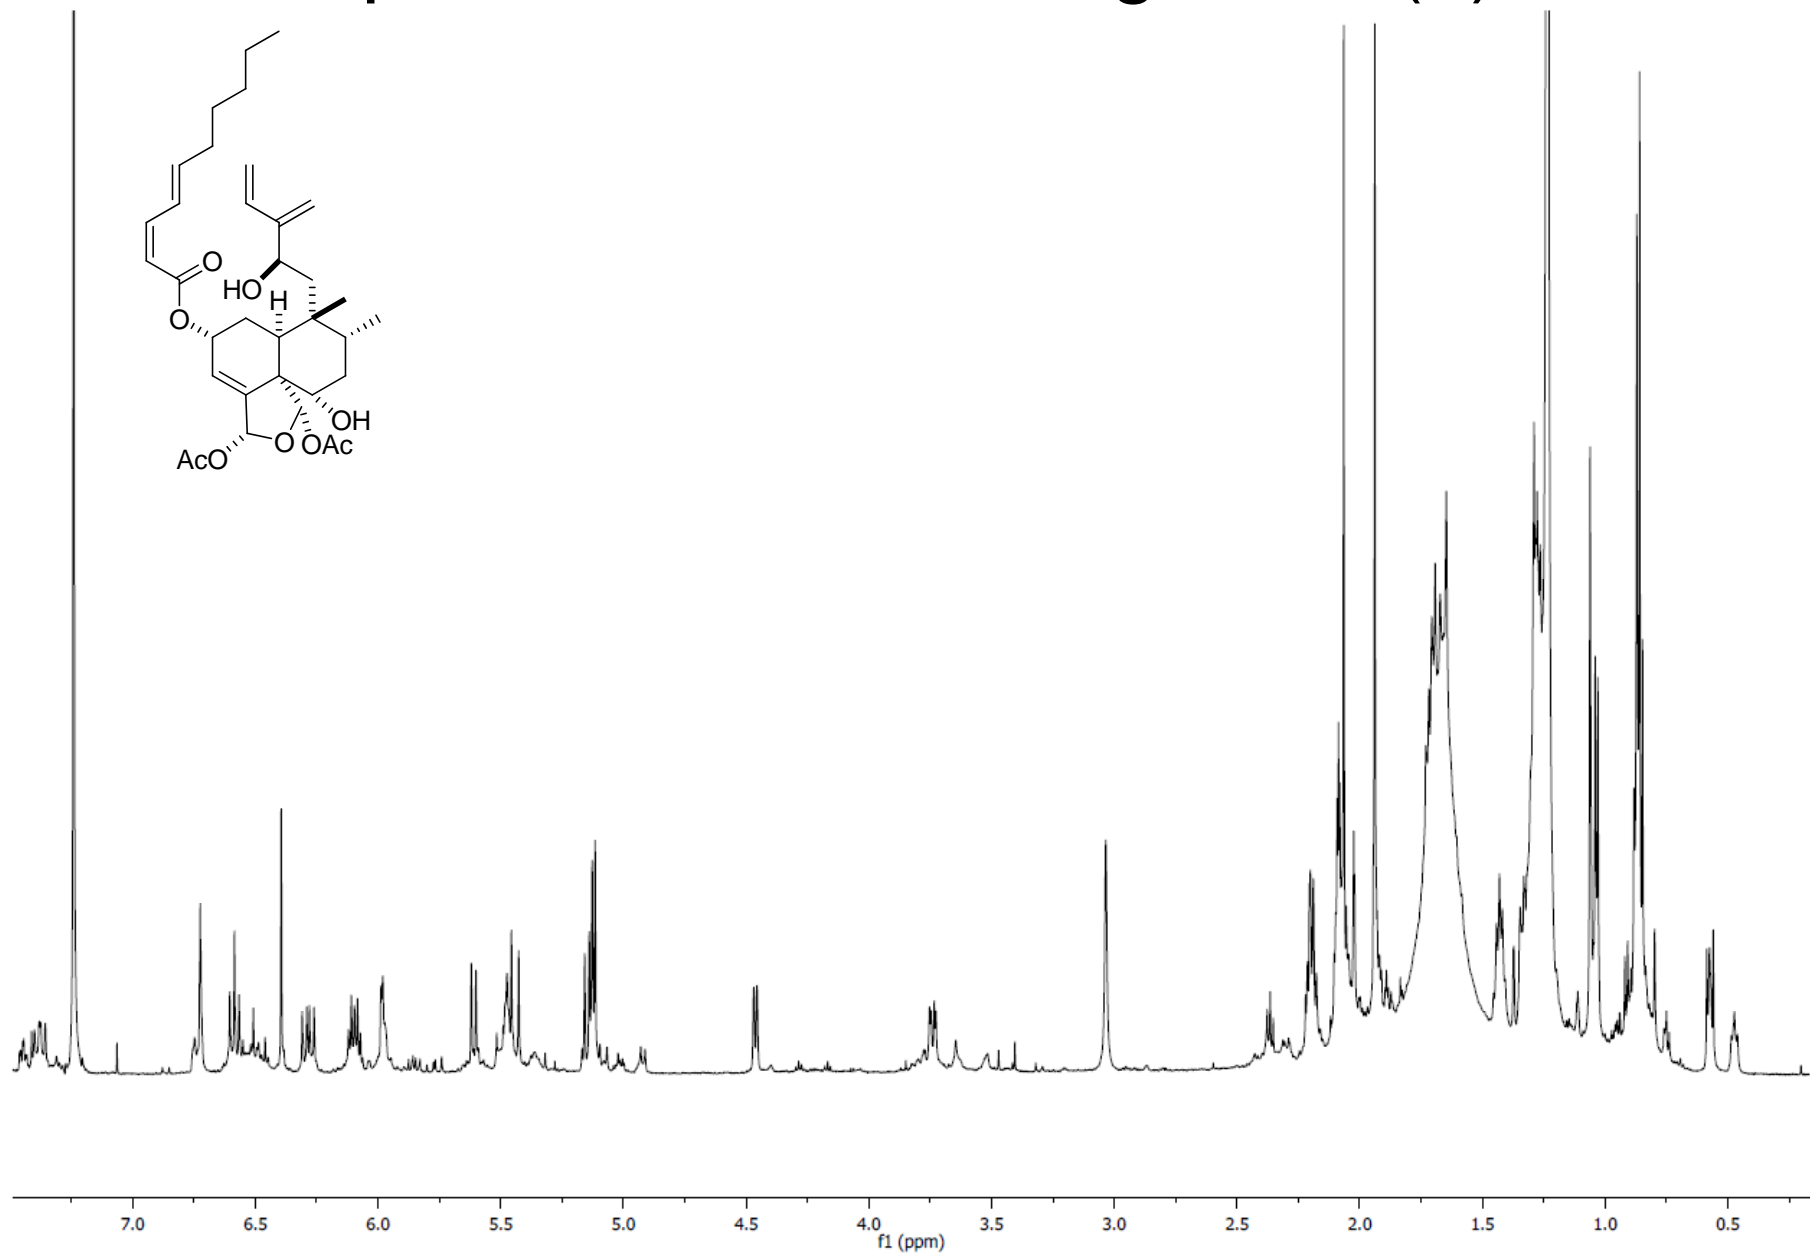

# $^{13}\text{C}$ NMR Spectrum of Deoxoargutin F (9) in $\text{CDCl}_3$

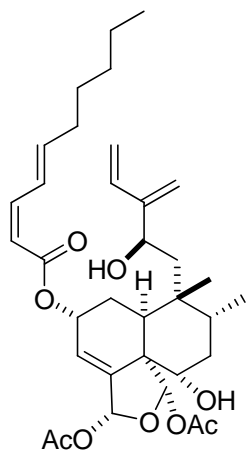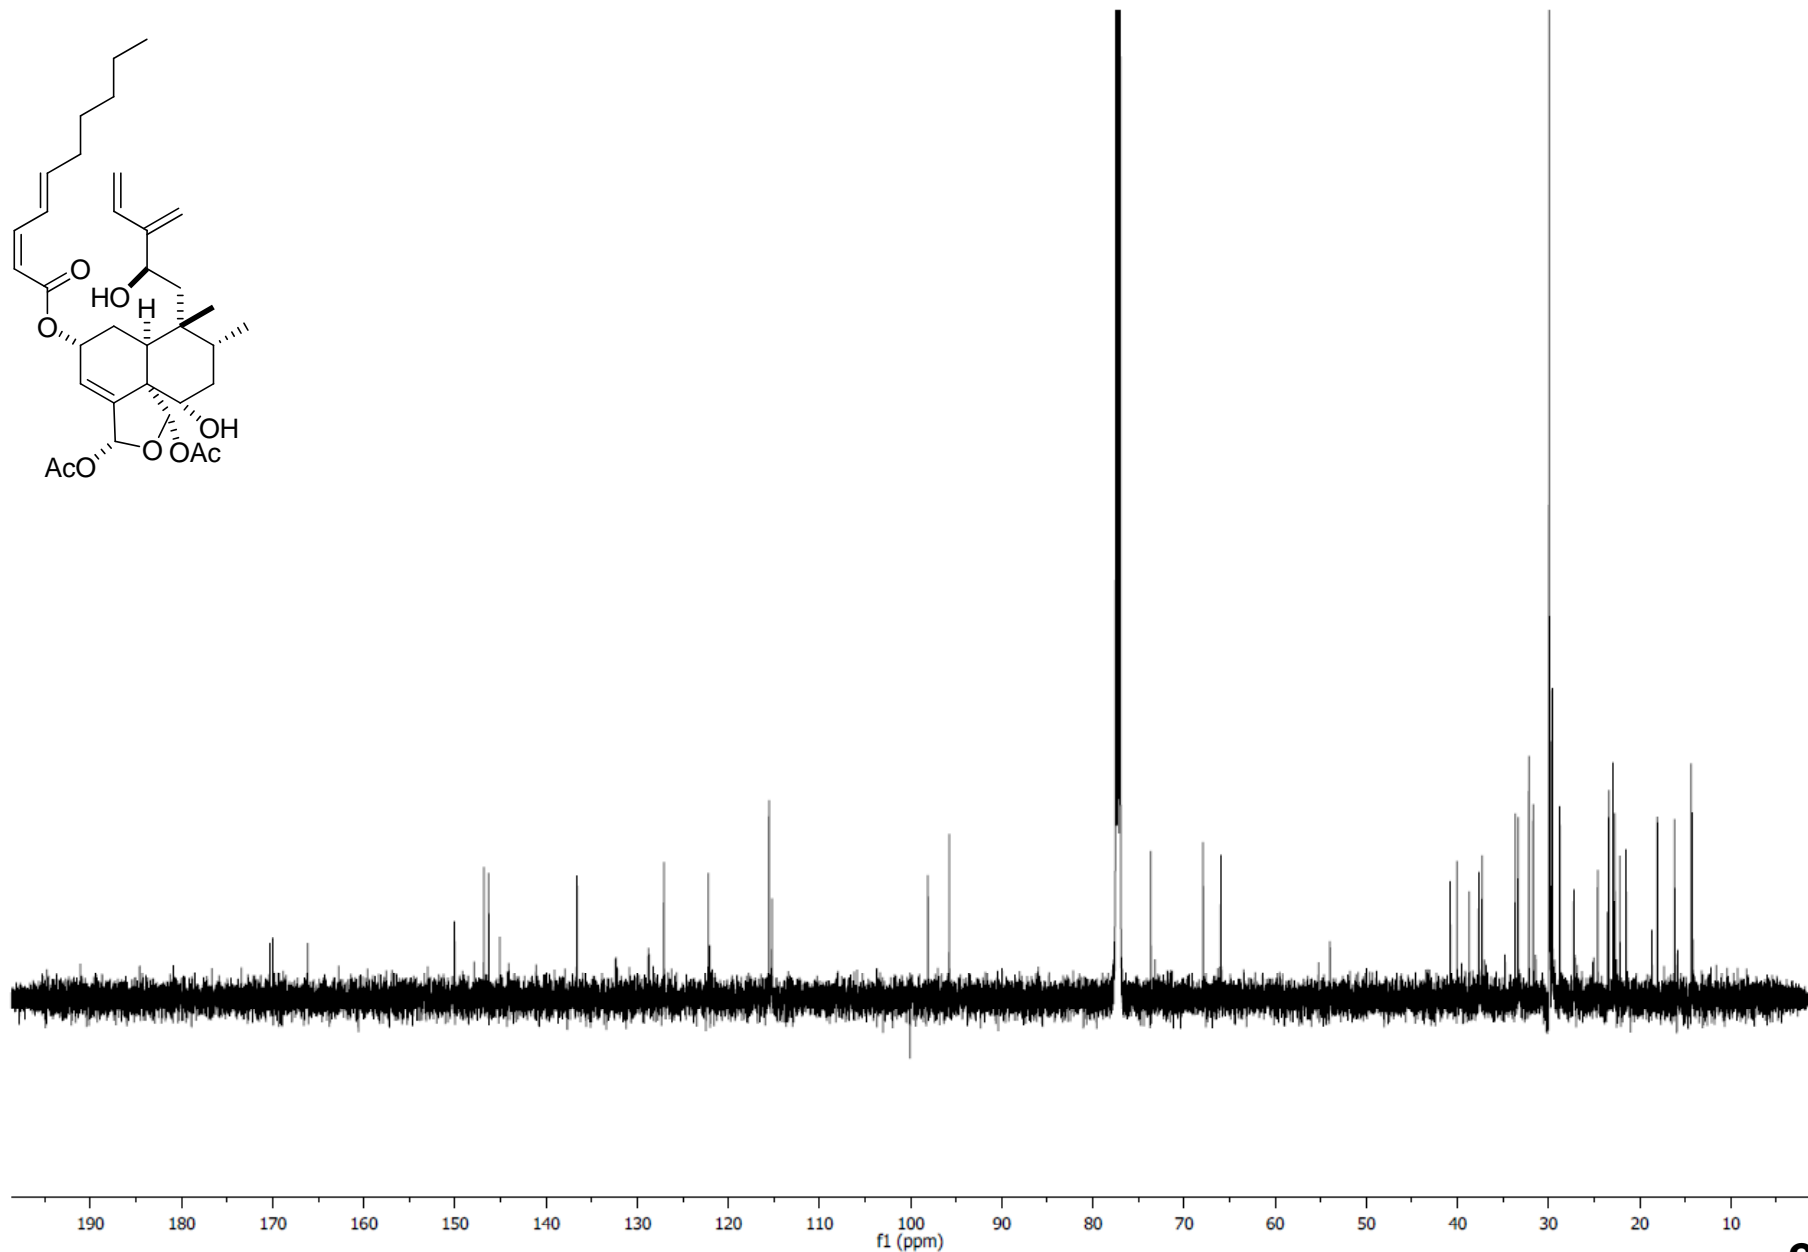

# $^1\text{H}$ NMR Spectrum of Deoxoargutin F (*S*)-MTPA Ester (**9S**) in $\text{CDCl}_3$

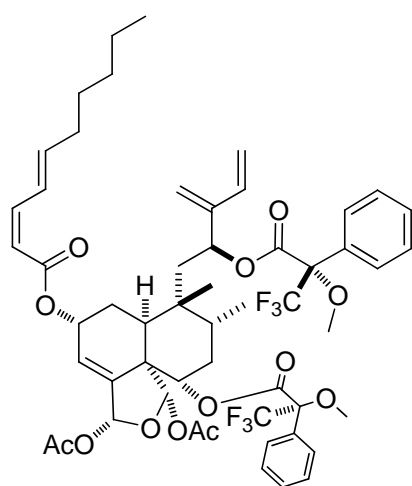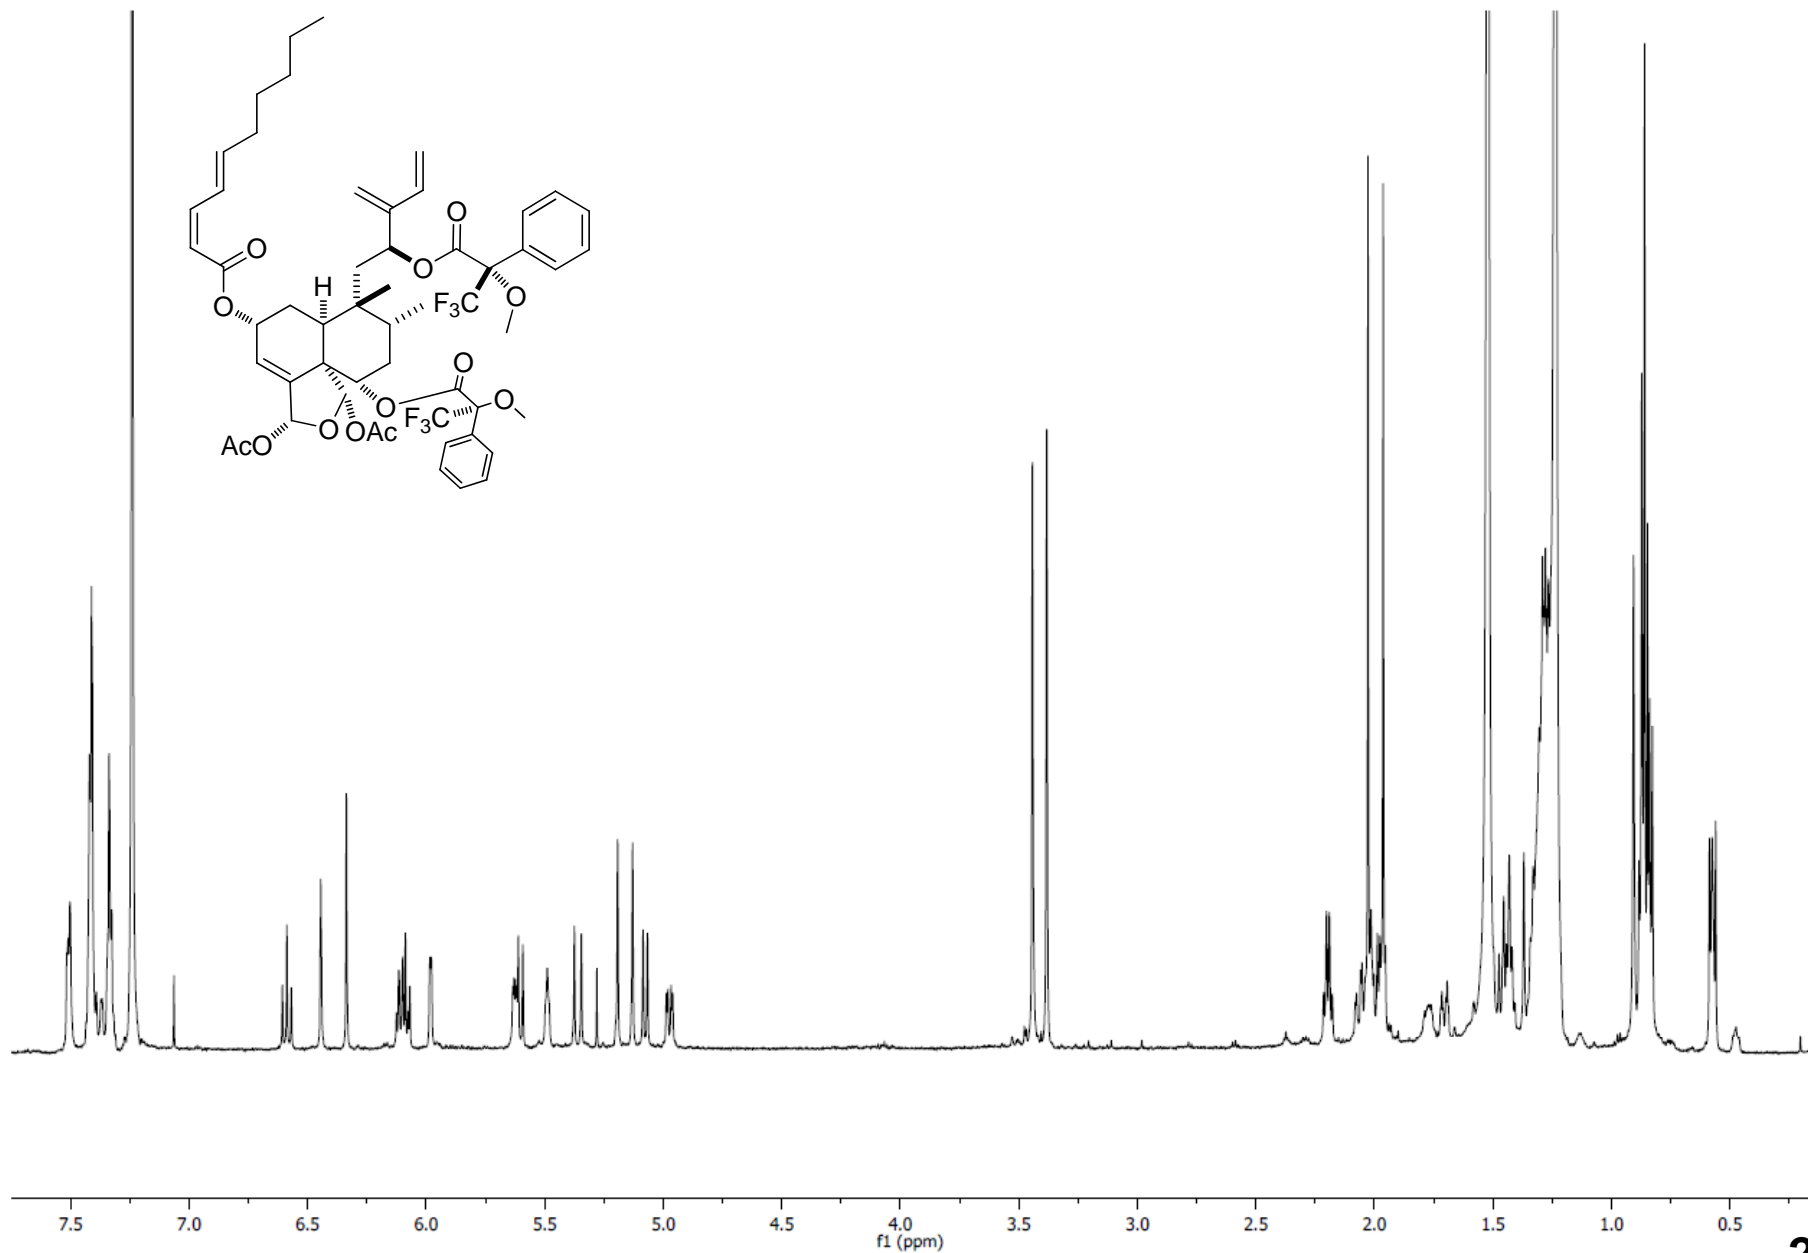



# HSQC Spectrum of Deoxoargutin F (S)-MTPA Ester (**9S**) in CDCl<sub>3</sub>

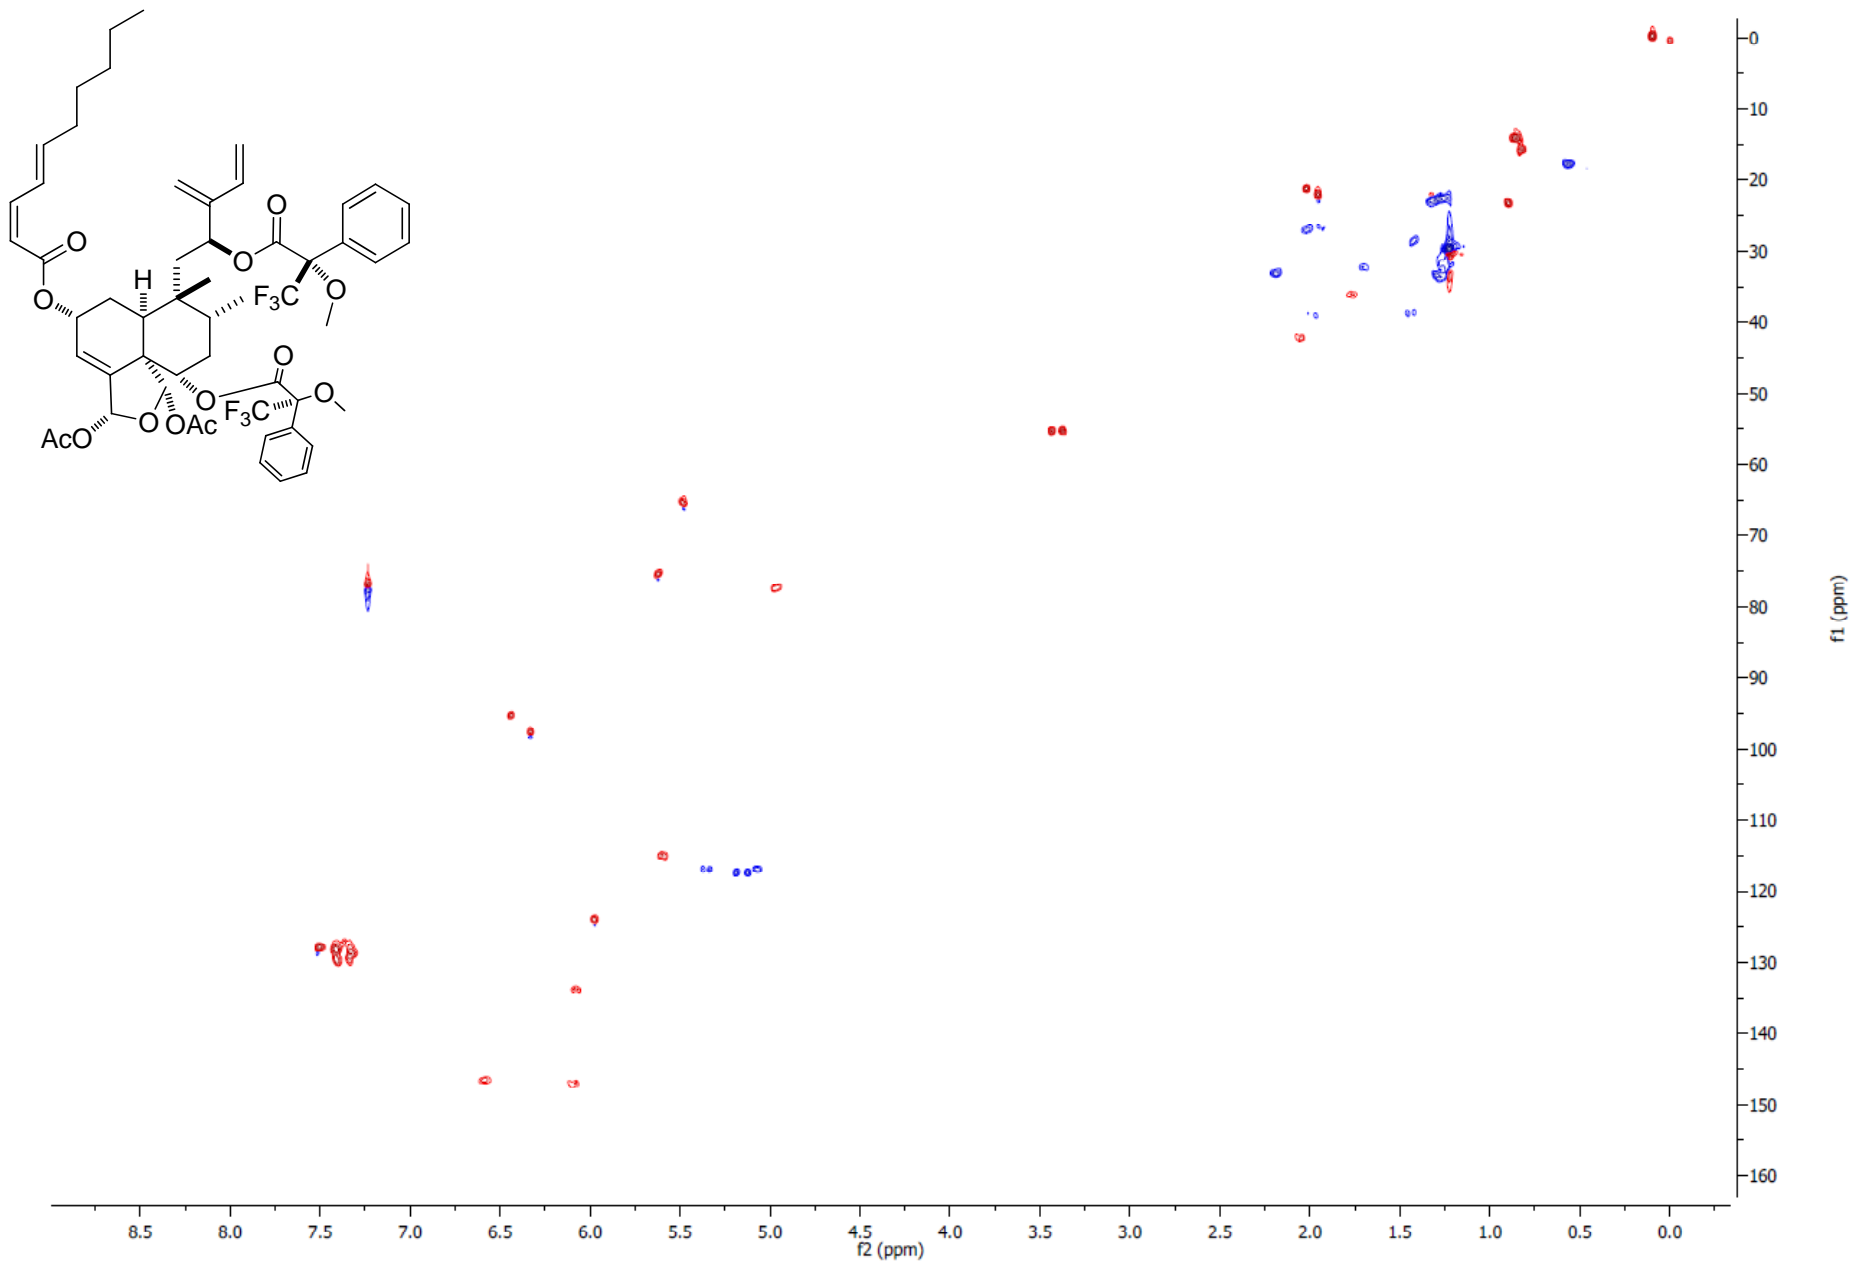

# $^1\text{H}$ NMR Spectrum of Deoxoargutin F (*R*)-MTPA Ester (**9R**) in $\text{CDCl}_3$

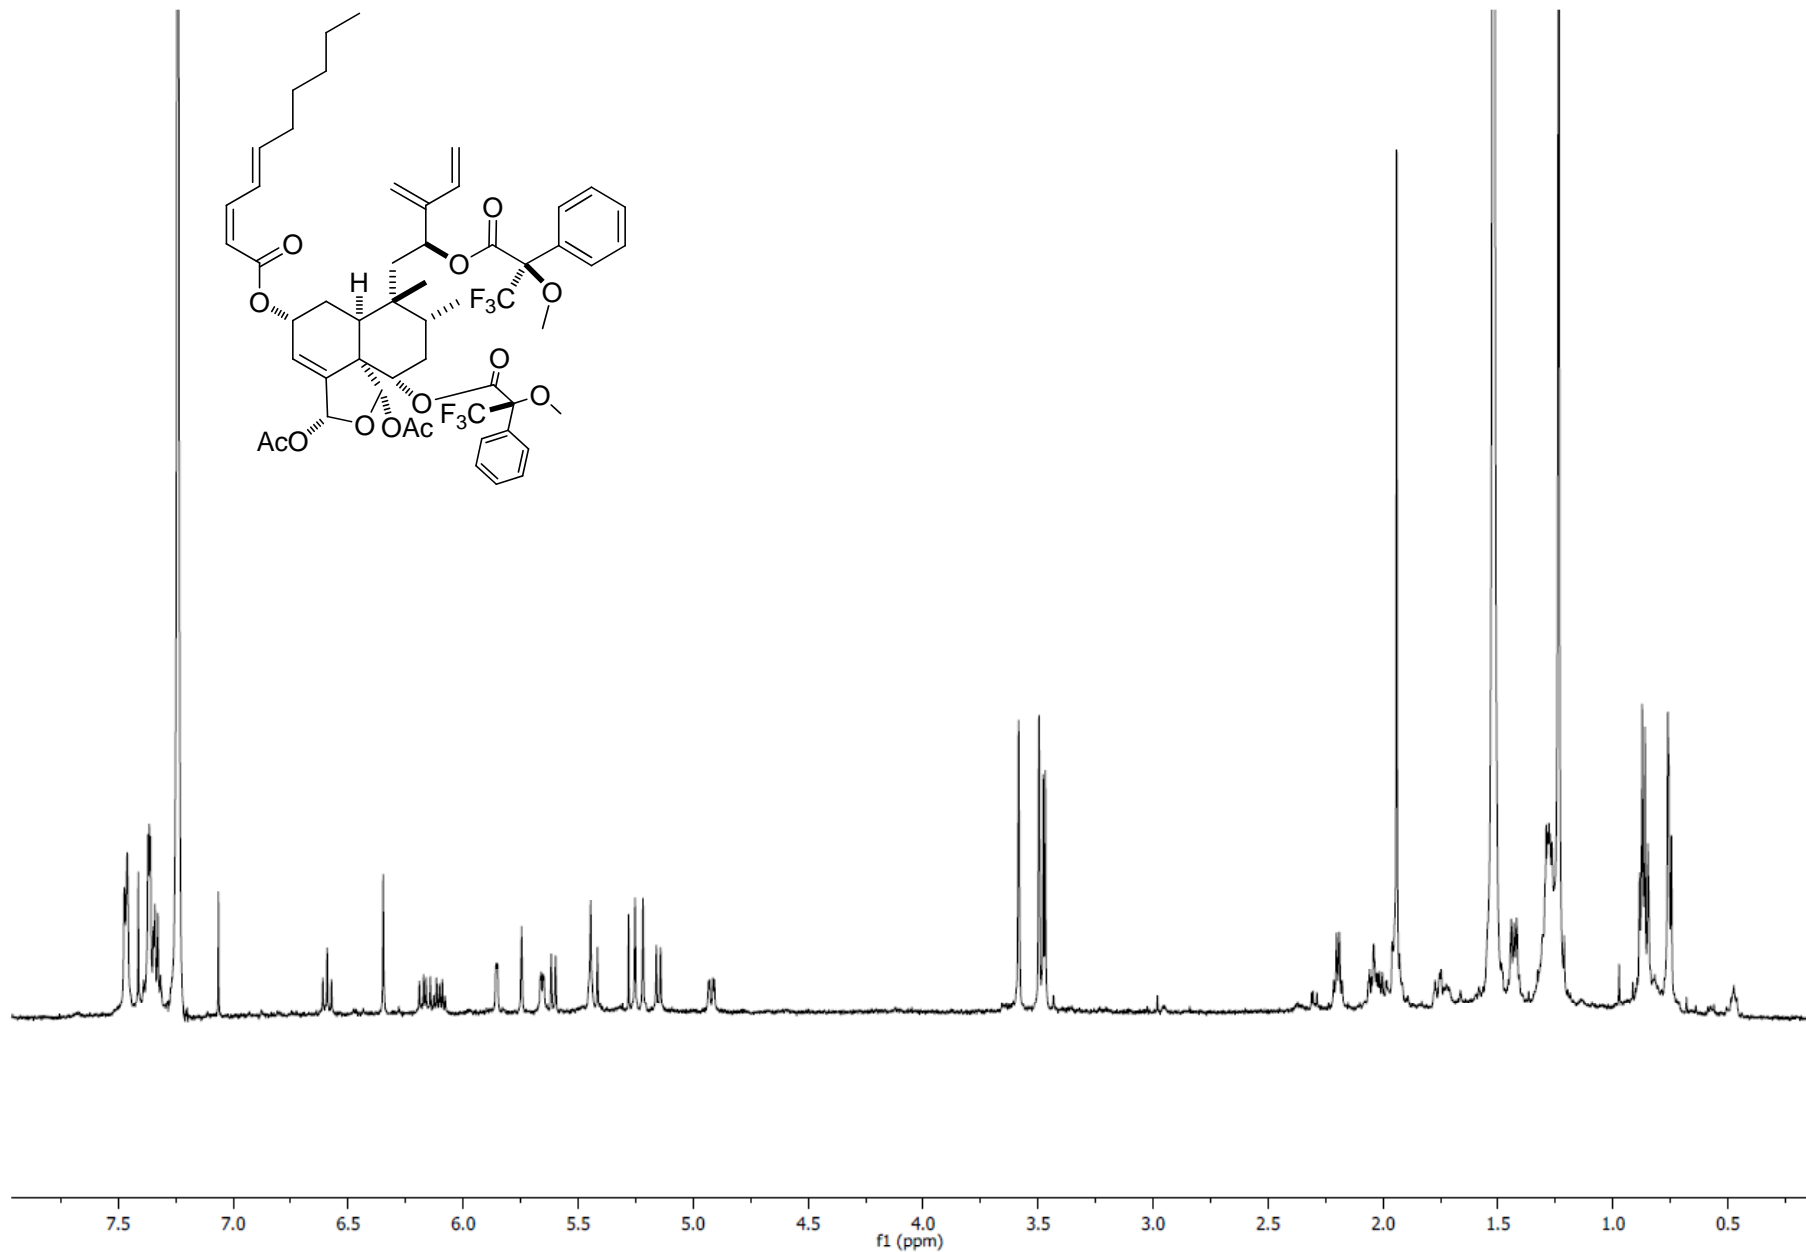

# HSQC Spectrum of Deoxoargutin F (*R*)-MTPA Ester (**9R**) in CDCl<sub>3</sub>

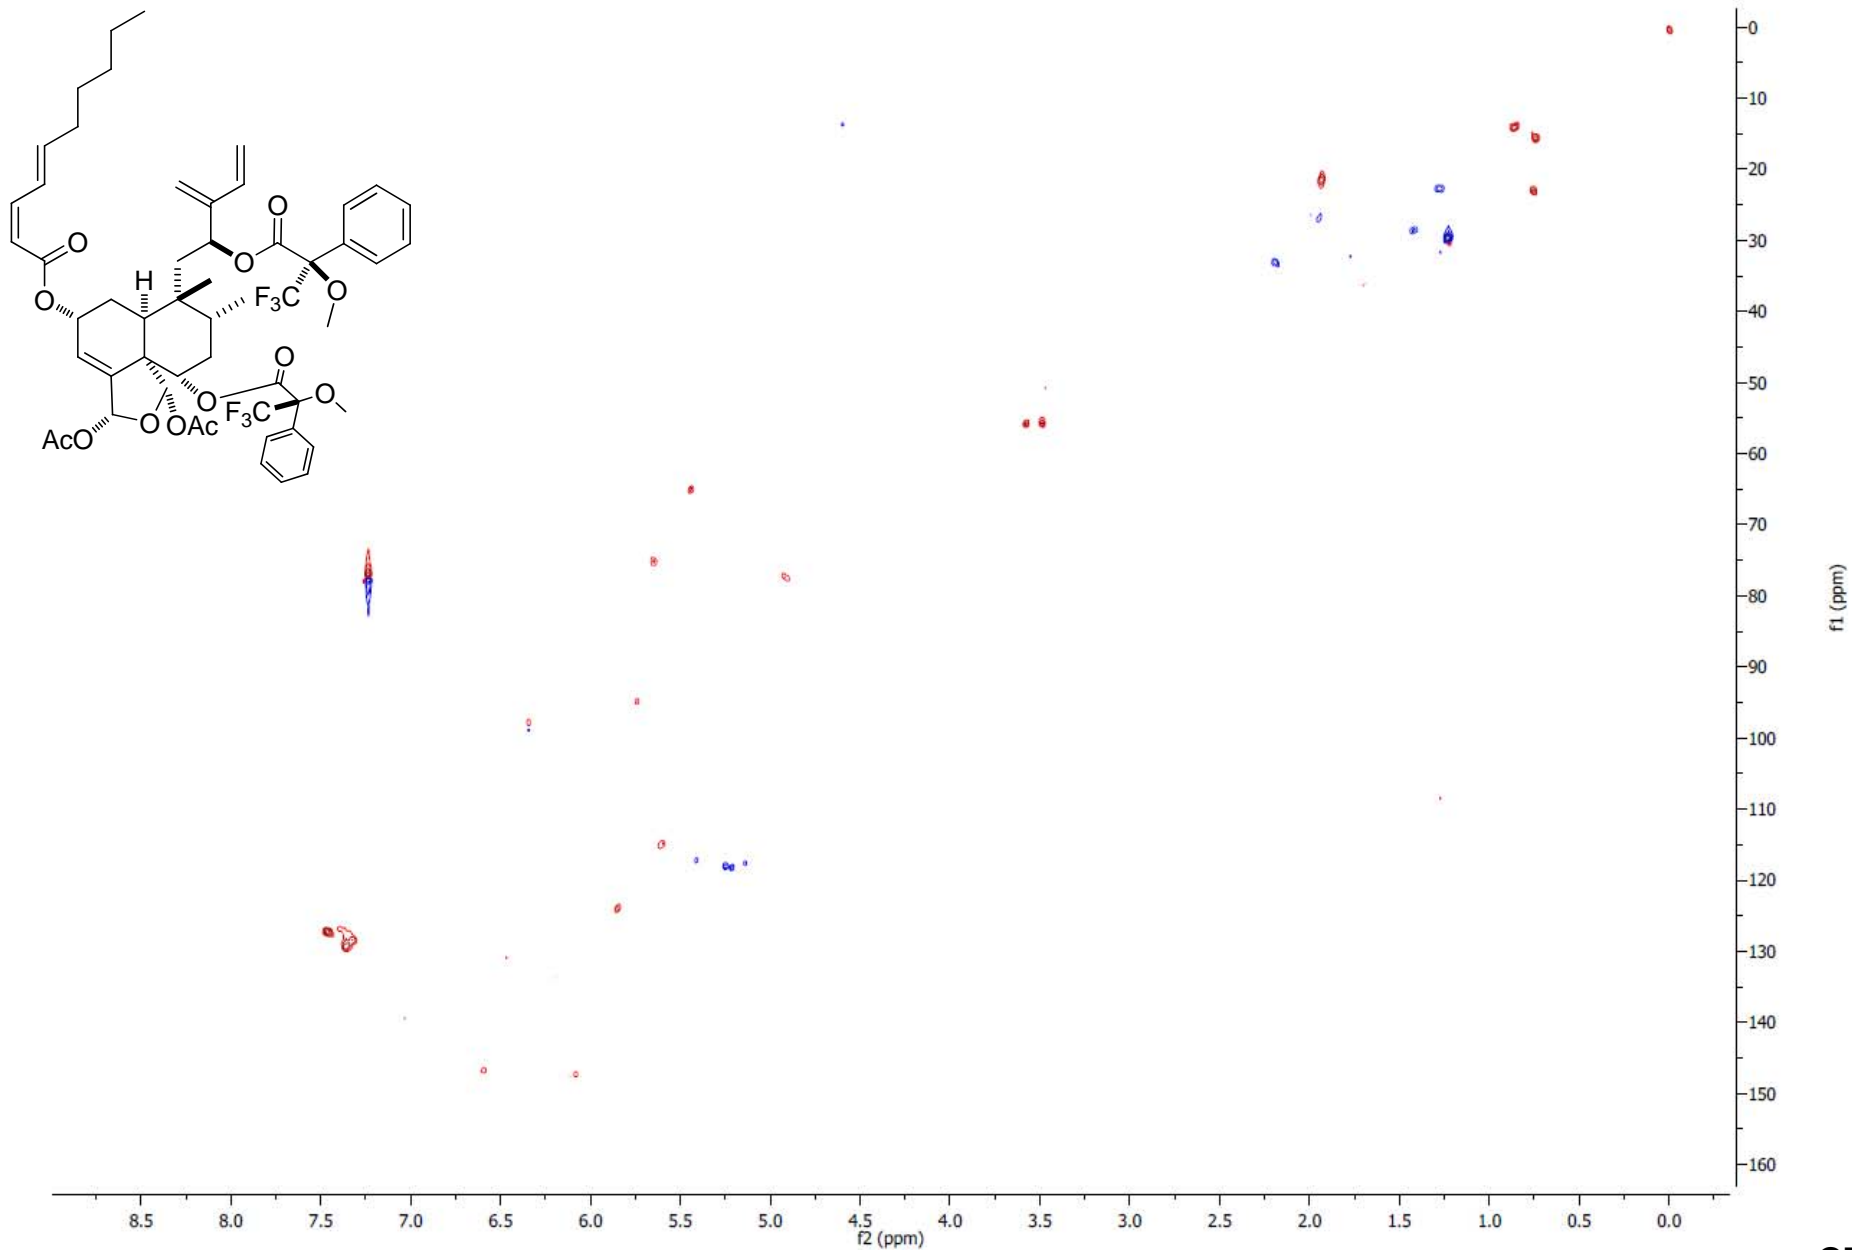

**Supplemental Table 1.** NMR Data for the MTPA esters of argutin A (**1S**, **1R**) (600 MHz, CDCl<sub>3</sub>)

| position                 | <b>1S</b>  |                              | <b>1R</b>          |                            | $\Delta\delta^{SR}$   |
|--------------------------|------------|------------------------------|--------------------|----------------------------|-----------------------|
|                          | $\delta_C$ | $\delta_H$ mult (J, Hz)      | $\delta_C$         | $\delta_H$ mult (J, Hz)    | $\delta^S - \delta^R$ |
| 1a                       | 27.1       | 2.08, ddd (13.8, 5.7, 5.3)   | 27.1               | 2.07, ddd (13.9, 5.8, 5.5) | +0.01                 |
| 1b                       |            | 1.95, m                      |                    | 1.93, <sup>b</sup> m       | +0.02                 |
| 2                        | 65.7       | 5.53, br t (4.0)             | 65.6               | 5.50, br t (4.1)           | +0.03                 |
| 3                        | 124.1      | 6.01, br d (4.0)             | 124.1              | 5.89, br d (4.1)           | +0.12                 |
| 4                        | 144.1      | —                            | 144.1              | —                          | —                     |
| 5                        | 51.9       | —                            | 51.8               | —                          | —                     |
| 6                        | 77.8       | 5.05, dd (12.1, 4.0)         | 77.7               | 5.02, dd (12.1, 3.9)       | +0.03                 |
| 7a                       | 32.7       | 1.80, ddd (13.0, 6.8, 4.0)   | 33.1               | 1.92, <sup>b</sup> m       | -0.12                 |
| 7b                       |            | 1.56, ddd (13.0, 13.0, 12.1) |                    | 1.67, <sup>b</sup> m       | -0.11                 |
| 8                        | 36.3       | 1.90, <sup>a</sup> m (6.8)   | 36.4               | 1.93, <sup>b</sup> m (6.7) | -0.03                 |
| 9                        | 37.9       | —                            | 37.9               | —                          | —                     |
| 10                       | 37.9       | 2.37, dd (13.8, 3.5)         | 37.9               | 2.34, dd (13.9, 3.6)       | +0.03                 |
| 11a                      | 30.5       | 2.21, <sup>b</sup> m         | 30.6               | 2.22, <sup>b</sup> m       | -0.01                 |
| 11b                      |            | 1.64, <sup>a</sup> m         |                    | 1.67, <sup>b</sup> m       | -0.03                 |
| 12                       | 129.0      | 5.35, br d (7.6)             | 129.0              | 5.35, br d (7.8)           | 0.00                  |
| 13                       | 136.0      | —                            | 136.1              | —                          | —                     |
| 14                       | 141.4      | 6.28, dd (17.3, 10.7)        | 141.4              | 6.28, dd (17.3, 10.8)      | 0.00                  |
| 15a                      | 111.4      | 5.06, d (17.3)               | 111.4              | 5.07, d (17.3)             | -0.01                 |
| 15b                      |            | 4.91, d (10.7)               |                    | 4.92, d (10.7)             | -0.01                 |
| 16                       | 12.2       | 1.63, s                      | 12.2               | 1.64, s                    | -0.01                 |
| 17                       | 15.8       | 0.91, d (6.8)                | 15.7               | 0.94, d (6.7)              | -0.03                 |
| 18                       | 95.7       | 6.44, t (1.6)                | 95.5               | 5.72, t (1.6)              | +0.72                 |
| 19                       | 97.3       | 6.51, s                      | 97.3               | 6.57, s                    | -0.06                 |
| 20                       | 25.2       | 0.82, s                      | 25.2               | 0.83, s                    | -0.01                 |
| 1'                       | 166.0      | —                            | 166.0              | —                          | —                     |
| 2'                       | 115.4      | 5.64, d (11.3)               | 115.4              | 5.62, d (11.3)             | +0.02                 |
| 3'                       | 146.5      | 6.60, t (11.3)               | 146.6              | 6.59, t (11.3)             | +0.01                 |
| 4'                       | 127.1      | 7.38, <sup>b</sup> m         | 127.1              | 7.37, <sup>b</sup> m       | +0.01                 |
| 5'                       | 147.0      | 6.11, ddd (15.1, 7.5, 7.1)   | 147.1              | 6.11, ddd (15.2, 7.7, 7.1) | 0.00                  |
| 6'                       | 33.4       | 2.20, <sup>b</sup> m         | 33.4               | 2.20, <sup>b</sup> m       | 0.00                  |
| 7'                       | 28.7       | 1.43, ddd (14.5, 7.4, 7.1)   | 28.8               | 1.43, ddd (14.6, 7.4, 7.1) | 0.00                  |
| 8'                       | 31.7       | 1.28, <sup>b</sup> m         | 31.7               | 1.28, <sup>b</sup> m       | 0.00                  |
| 9'                       | 22.7       | 1.29, <sup>b</sup> m         | 22.7               | 1.29, <sup>b</sup> m       | 0.00                  |
| 10'                      | 14.3       | 0.87, t (6.7)                | 14.2               | 0.87, t (6.7)              | 0.00                  |
| 18-OAc                   | 170.1      | —                            | 169.7 <sup>d</sup> | —                          | —                     |
|                          | 21.5       | 2.03, s                      | 21.4               | 1.95, s                    | +0.08                 |
| 19-OAc                   | 169.7      | —                            | 169.6 <sup>d</sup> | —                          | —                     |
|                          | 22.1       | 1.92, s                      | 22.0               | 1.89, s                    | +0.03                 |
| <b>OMTPA<sup>c</sup></b> | —          | —                            | —                  | —                          | —                     |
| C=O                      | 167.1      | —                            | 166.9              | —                          | —                     |
| OMe                      | 55.6       | 3.44, s                      | 56.1               | 3.60, s                    | —                     |
|                          | 128.9      | 7.41, <sup>b</sup> m         | 128.8              | 7.38, <sup>b</sup> m       | —                     |
|                          | 129.0      | 7.40, <sup>b</sup> m         | 130.0              | 7.37, <sup>b</sup> m       | —                     |
|                          | 127.9      | 7.50, m                      | 127.2              | 7.48, <sup>b</sup> m       | —                     |

<sup>a</sup>Signal obscured by overlapping methyl signal. <sup>b</sup>Signals overlapped. <sup>c</sup>Not all MTPA carbons were assigned. <sup>d</sup>Assignment may be reversed.

**Supplemental Table 2.** NMR data for deoxoargutin F (**9**) (600 MHz, CDCl<sub>3</sub>)

| deoxoargutin F ( <b>9</b> ) |            |                                  |
|-----------------------------|------------|----------------------------------|
| position                    | $\delta_C$ | $\delta_H$ mult ( <i>J</i> , Hz) |
| 1a                          | 27.1       | 2.03, m                          |
| 1b                          |            | 1.93, <sup>a</sup> m             |
| 2                           | 65.7       | 5.47, br t (4.1)                 |
| 3                           | 122.1      | 5.98, br d (4.1)                 |
| 4                           | 145.1      | —                                |
| 5                           | 54.0       | —                                |
| 6                           | 73.4       | 3.74, dd (11.5, 4.1)             |
| 7a                          | 37.8       | 1.69, <sup>b</sup> m             |
| 7b                          |            | 1.65, <sup>b</sup> m             |
| 8                           | 37.3       | 1.70, <sup>b</sup> m (6.6)       |
| 9                           | 38.7       | —                                |
| 10                          | 40.7       | 2.09, m                          |
| 11a                         | 39.9       | 1.71, <sup>b</sup> m             |
| 11b                         |            | 1.36, m                          |
| 12                          | 67.7       | 4.46, br d (7.8)                 |
| 13                          | 150.1      | —                                |
| 14                          | 136.6      | 6.28, dd (17.8, 11.2)            |
| 15a                         | 115.4      | 5.44, d (17.8)                   |
| 15b                         |            | 5.15, d (11.2)                   |
| 16a                         | 115.1      | 5.13, s                          |
| 16b                         |            | 5.12, s                          |
| 17                          | 16.0       | 1.04, d (6.6)                    |
| 18                          | 95.3       | 6.72, br t (1.5)                 |
| 19                          | 97.7       | 6.39, s                          |
| 20                          | 24.5       | 1.06, s                          |
| 1'                          | 166.1      | —                                |
| 2'                          | 115.4      | 5.61, d (11.3)                   |
| 3'                          | 146.3      | 6.58, t (11.3)                   |
| 4'                          | 127.0      | 7.37, dd (15.3, 11.3)            |
| 5'                          | 147.0      | 6.10, ddd (15.3, 7.7, 7.0)       |
| 6'                          | 33.2       | 2.19, ddd (14.6, 7.4, 7.0)       |
| 7'                          | 29.0       | 1.43, ddd (14.4, 7.4, 7.1)       |
| 8'                          | 31.8       | 1.27, <sup>b</sup> m             |
| 9'                          | 22.8       | 1.28, <sup>b</sup> m             |
| 10'                         | 14.3       | 0.86, t (6.8)                    |
| 18-OAc                      | 170.3      | —                                |
|                             | 21.3       | 2.06, s                          |
| 19-OAc                      | 170.0      | —                                |
|                             | 21.9       | 1.93, s                          |

<sup>a</sup>Signal obscured by overlapping methyl signal. <sup>b</sup>Signals overlapped.

**Supplemental Table 3.** NMR Data for the MTPA esters of **9** (**9S**, **9R**) (600 MHz, CDCl<sub>3</sub>)

| position     | <b>9S<sup>a</sup></b> |                                    | <b>9R<sup>a</sup></b> |                               | $\Delta\delta^{SR}$ |
|--------------|-----------------------|------------------------------------|-----------------------|-------------------------------|---------------------|
|              | $\delta_C$            | $\delta_H$ mult (J, Hz)            | $\delta_C$            | $\delta_H$ mult (J, Hz)       |                     |
| 1a           | 27.1                  | 2.02, <sup>b</sup> m               | 26.9                  | 1.99, <sup>c</sup> m          | +0.03               |
| 1b           |                       | 1.94, <sup>b</sup> m               |                       | 1.94, <sup>b</sup> m          | 0.00                |
| 2            | 65.3                  | 5.49, br t (4.0)                   | 65.1                  | 5.44, <sup>c</sup> br t (4.1) | +0.05               |
| 3            | 124.0                 | 5.98, br d (4.0)                   | 124.0                 | 5.85, br d (4.1)              | +0.13               |
| 6            | 77.5                  | 4.97, dd (12.1, 3.9)               | 77.5                  | 4.92, dd (12.3, 4.0)          | +0.05               |
| 7a           | 32.4                  | 1.70, ddd (13.2, 6.8, 3.9)         | 32.7                  | 1.76, ddd (13.2, 6.7, 3.9)    | -0.06               |
| 7b           |                       | 1.45, <sup>c</sup> m               |                       | 1.50, m                       | -0.05               |
| 8            | 36.2                  | 1.77, m (6.9)                      | 36.4                  | 1.72, m (7.0)                 | +0.05               |
| 10           | 42.4                  | 2.06, dd (13.7, 3.6)               | 41.9                  | 2.05, dd (13.8, 3.5)          | +0.01               |
| 11a          | 38.9                  | 1.99, <sup>b</sup> m               | 38.1                  | 2.02, <sup>c</sup> m          | -0.03               |
| 11b          |                       | 1.44, <sup>c</sup> m               |                       | 1.43, <sup>c</sup> m          | +0.01               |
| 12           | 75.4                  | 5.63, dd (7.0, 3.3)                | 75.3                  | 5.66, dd (7.1, 2.8)           | -0.03               |
| 14           | 133.9                 | 6.07, <sup>c</sup> dd (17.7, 11.2) | 134.0                 | 6.17, dd (17.6, 11.1)         | -0.10               |
| 15a          | 117.0                 | 5.36, d (17.7)                     | 117.2                 | 5.43, <sup>c</sup> d (17.6)   | -0.07               |
| 15b          |                       | 5.07, d (11.2)                     |                       | 5.15, d (11.1)                | -0.08               |
| 16a          | 117.4                 | 5.19, s                            | 118.1                 | 5.25, s                       | -0.06               |
| 16b          |                       | 5.13, s                            |                       | 5.21, s                       | -0.08               |
| 17           | 15.9                  | 0.83, d (6.9)                      | 15.7                  | 0.75, d (7.0)                 | +0.08               |
| 18           | 95.4                  | 6.44, br t (1.6)                   | 94.9                  | 5.75, br t (1.6)              | +0.69               |
| 19           | 97.7                  | 6.34, s                            | 97.5                  | 6.35, s                       | -0.01               |
| 20           | 23.2                  | 0.91, s                            | 23.1                  | 0.76, s                       | +0.15               |
| 2'           | 115.1                 | 5.60, d (11.3)                     | 115.1                 | 5.61, d (11.3)                | -0.01               |
| 3'           | 146.6                 | 6.59, t (11.3)                     | 146.8                 | 6.59, t (11.3)                | 0.00                |
| 4'           | 127.2                 | 7.36, <sup>c</sup> m               | 127.1                 | 7.37, <sup>c</sup> m          | 0.00                |
| 5'           | 147.2                 | 6.09, <sup>c</sup> m               | 147.2                 | 6.10, ddd (15.3, 7.8, 7.4)    | 0.00                |
| 6'           | 33.3                  | 2.20, ddd (14.7, 7.4, 7.2)         | 33.2                  | 2.20, ddd (14.7, 7.7, 7.4)    | 0.00                |
| 7'           | 28.7                  | 1.43, <sup>c</sup> m               | 28.7                  | 1.43, <sup>c</sup> m          | 0.00                |
| 8'           | 31.9                  | 1.28, <sup>c</sup> m               | 31.8                  | 1.28, <sup>c</sup> m          | 0.00                |
| 9'           | 22.8                  | 1.28, <sup>c</sup> m               | 22.8                  | 1.28, <sup>c</sup> m          | 0.00                |
| 10'          | 14.2                  | 0.86, t (6.9)                      | 14.1                  | 0.86, t (7.0)                 | 0.00                |
| 18-OAc       | 21.3                  | 2.03, s                            | 21.7                  | 1.94, <sup>c</sup> s          | +0.09               |
| 19-OAc       | 22.1                  | 1.96, s                            | 21.7                  | 1.94, <sup>c</sup> s          | +0.02               |
| <b>OMTPA</b> | —                     | —                                  | —                     | —                             | —                   |
| OMe          | 55.4                  | 3.44, s                            | 55.7                  | 3.58, s                       | —                   |
| OMe          | 55.3                  | 3.38, s                            | 55.6                  | 3.49, s                       | —                   |
|              | 128.2                 | 7.41, <sup>c</sup> m               | 128.0                 | 7.36, <sup>c</sup> m          | —                   |
|              | 129.6                 | 7.41, <sup>c</sup> m               | 129.2                 | 7.36, <sup>c</sup> m          | —                   |
|              | 128.8                 | 7.34, <sup>c</sup> m               | 127.5                 | 7.33, <sup>c</sup> m          | —                   |
|              | 129.4                 | 7.34, <sup>c</sup> m               | 128.7                 | 7.33, <sup>c</sup> m          | —                   |
|              | 127.9                 | 7.50, m                            | 127.3                 | 7.46, m                       | —                   |

<sup>a</sup>Quaternary carbons were not assigned. <sup>b</sup>Signal obscured by overlapping methyl signal. <sup>c</sup>Signals overlapped.
